# Supplementary material for: Comparing resting state and task-based EEG using machine learning to predict vulnerability to depression in a non-clinical population
Source: Springer Nature journal article supplement (doi:10.1038/s41598-023-34298-2), 2023-05-08
Supplement: 41598_2023_34298_MOESM1_ESM.pdf [file 41598_2023_34298_MOESM1_ESM.pdf]

# Supplementary Material: Comparing resting state and task-based EEG using machine learning to predict vulnerability to depression in a non-clinical population

Pallavi Kaushik<sup>1,2,\*</sup>, Hang Yang<sup>1</sup>, Marieke van Vugt<sup>1</sup>, and Partha Pratim Roy<sup>2</sup>

<sup>1</sup>Bernoulli Institute of Mathematics, Computer Science and Artificial Intelligence, University of Groningen, 9700 AK, the Netherlands.

<sup>2</sup>Department of Computer Science and Engineering, Indian Institute of Technology, Roorkee, 247667, India

\*pkaushik@cs.iitr.ac.in/p.kaushik@rug.nl

## Legend

Supplemental Table 1: Probe questions asked during the Sustained Attention to Response Task used to determine vulnerability in a task-based context.

Supplemental Table II: Results of statistical analysis on various features of the **resting state EEG data**. Results of statistical analysis on various features of the resting state EEG data. The column ‘p-value threshold’ contains the p-value threshold corresponding to the False Discovery Rate (FDR) threshold of 0.05. The ‘topoplots’ column shows topographical maps with the p-values (after FDR correction) in each channel corresponding to the average difference in a given feature for individuals with higher and lower vulnerability to depression.

Supplemental Table III: Results of statistical analysis on the **task-based EEG data**. The column ‘p-value threshold’ contains the p-value threshold corresponding to the False Discovery Rate (FDR) threshold of 0.05. The ‘topoplots’ column contains topographical maps with p-values of each channel after FDR. The maps showcase the average difference in EEG activity corresponding to the “stickiness” trials (high and low stickiness combined) between individuals with higher and lower vulnerability to depression. The column ‘p-value threshold’ contains the p-value threshold corresponding to the False Discovery Rate (FDR) threshold of 0.05. The ‘topoplots’ column contains topographical maps with p-values of each channel after FDR. The maps showcase the average difference in EEG activity corresponding to the “stickiness” trials (high and low stickiness combined) between individuals with higher and lower vulnerability to depression.

Supplemental Table IV: Results of statistical analysis on the brain waves of **task-based EEG data**. This table shows the average EEG differences in trials reported as “high/low” stickiness between individuals with higher and lower vulnerability to depression. The column ‘p-value threshold’ contains the p-value threshold corresponding to the False Discovery Rate (FDR) threshold of 0.05.

Supplemental Table V: Results of statistical analysis on the brain waves of **task-based EEG data**. This table shows the average differences in EEG activity between “high” and “low” stickiness trials for individuals within the two groups. The column ‘p-value threshold’ contains the p-value threshold corresponding to the False Discovery Rate (FDR) threshold of 0.05.

Supplemental Methods: Background on Classifiers

Supplemental Methods: Hyperparameter tuning

Supplemental Methods: Evolutionary algorithms

Supplemental Methods: Feature Extraction

Supplemental Table VI: The confusion matrices for **rs-EEG classification** results using 1D-CNN, LSTM and BLSTM

Supplemental Table VII: The confusion matrices for classification results of **task-based EEG data** using 1D-CNN, LSTM and BLSTM

Supplemental Table VIII: The confusion matrices for classification results of **task-based EEG data** using MultiLayer Perceptron (MLP) and Decision Tree (DT)

Supplemental Table IX: The confusion matrices for classification results of **rs-EEG** using MultiLayer Perceptron (MLP) and Decision Tree (DT).

**Supplemental Table 1.** Probe questions asked during the Sustained Attention to Response Task used to determine vulnerability in a task-based context.

| <b>Dimension of the thoughts</b> | <b>Probe questions</b>                               | <b>Responses</b>                                                                                                                                                                                                                                                                                                                                                                                                                     |
|----------------------------------|------------------------------------------------------|--------------------------------------------------------------------------------------------------------------------------------------------------------------------------------------------------------------------------------------------------------------------------------------------------------------------------------------------------------------------------------------------------------------------------------------|
| Content                          | What were you thinking?                              | 1. I was completely focused on the task.<br>2. I was evaluating aspects of the task (e.g., how I was doing or how long the task was taking).<br>3. I was thinking about personal things.<br>4. I was distracted by my environment (e.g., sound, temperature, my physical state).<br>5. I was daydreaming or thinking about task-irrelevant things.<br>6. I was not paying attention, and did not think about anything in particular. |
| Degree of self-focus             | To what extent were your thoughts self-focused?      | Ranging from 1 (completely non self-focused/about others) to 9 (completely self-focused)                                                                                                                                                                                                                                                                                                                                             |
| Valence                          | How positive or negative were your thoughts?         | Ranging from 1 (very negative) to 9 (very positive)                                                                                                                                                                                                                                                                                                                                                                                  |
| Stickiness                       | How difficult was it to disengage from the thoughts? | Ranging from 1 (very easy) to 9 (very difficult)                                                                                                                                                                                                                                                                                                                                                                                     |

**Supplemental Table II.** Results of statistical analysis on various features of the resting state EEG data. The column ‘p-value threshold’ contains the p-value threshold corresponding to the False Discovery Rate (FDR) threshold of 0.05. The ‘topoplots’ column shows topographical maps with the p-values (after FDR correction) in each channel corresponding to the average difference in a given feature for individuals with higher and lower vulnerability to depression.

| <b>Feature</b> | <b>p-value threshold corresponding to FDR value of 0.05</b> | <b>Topoplot</b> |
|----------------|-------------------------------------------------------------|-----------------|
|                |                                                             |                 |

|                |                            |           |                        |
|----------------|----------------------------|-----------|------------------------|
| 1              | Raw EEG data after ICA     | 4.880e-17 |                        |
| Power spectrum |                            |           |                        |
| 2              | Delta brain wave (0.5-4Hz) | 1.095e-11 |                        |
| 3              | Theta brain wave (4-8Hz)   | 0         | No channel significant |
| 4              | Alpha brain wave (8-12Hz)  | 0         | No channel significant |
| 5              | Beta brain wave (12-28Hz)  | 0         | No channel significant |
| 6              | Gamma brain wave (28-40Hz) | 0         | No channel significant |
| Correlation    |                            |           |                        |

|                                    |                            |           |                                                                                      |
|------------------------------------|----------------------------|-----------|--------------------------------------------------------------------------------------|
| 7                                  | Raw EEG data after ICA     | 2.570e-04 | 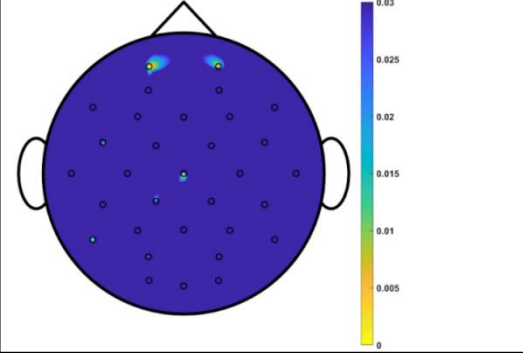   |
| 8                                  | Delta brain wave (0.5-4Hz) | 0.014     |    |
| 9                                  | Theta brain wave (4-8Hz)   | 0         | Nothing significant                                                                  |
| 10                                 | Alpha brain wave (8-12Hz)  | 0         | Nothing significant                                                                  |
| 11                                 | Beta brain wave 12-28Hz)   | 0         | Nothing significant                                                                  |
| 12                                 | Gamma brain wave(28-40Hz)  | 0         | Nothing significant                                                                  |
| <b>Absolute value of Coherence</b> |                            |           |                                                                                      |
| 13                                 | Raw EEG data after ICA     |           | Nothing significant                                                                  |
| 14                                 | Delta brain wave (0.5-4Hz) | 0.008     |  |
| 15                                 | Theta brain wave (4-8Hz)   | 0         | Nothing significant                                                                  |
| 16                                 | Alpha brain wave (8-12Hz)  | 0         | Nothing significant                                                                  |
| 17                                 | Beta brain wave 12-28Hz)   | 0         | Nothing significant                                                                  |

|                                    |                            |       |                     |
|------------------------------------|----------------------------|-------|---------------------|
| 18                                 | Gamma brain wave(28-40Hz)  | 0.002 |                     |
| <b>Imaginary part of coherence</b> |                            |       |                     |
| 19                                 | Raw EEG data after ICA     | 0     | Nothing significant |
| 20                                 | Delta brain wave (0.5-4Hz) | 0     | Nothing significant |
| 21                                 | Theta brain wave (4-8Hz)   | 0     | Nothing significant |
| 22                                 | Alpha brain wave (8-12Hz)  | 0     | Nothing significant |
| 23                                 | Beta brain wave 12-28Hz)   | 0     | Nothing significant |
| 24                                 | Gamma brain wave(28-40Hz)  | 0     | Nothing significant |
| <b>Phase lag index</b>             |                            |       |                     |
| 25                                 | Raw EEG data after ICA     | 0.004 |                     |
| 26                                 | Delta brain wave (0.5-4Hz) | 0.014 |                     |
| 27                                 | Theta brain wave (4-8Hz)   | 0     | Nothing significant |
| 28                                 | Alpha brain                | 0     | Nothing significant |

|                           |                            |       |                                                                                      |
|---------------------------|----------------------------|-------|--------------------------------------------------------------------------------------|
|                           | wave (8-12Hz)              |       |                                                                                      |
| 29                        | Beta brain wave 12-28Hz)   | 0     | Nothing significant                                                                  |
| 30                        | Gamma brain wave(28-40Hz)  | 0.004 | 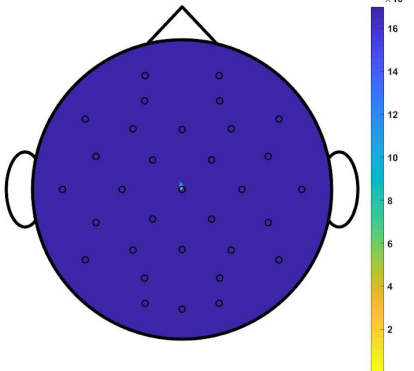   |
| <b>Phase lag value</b>    |                            |       |                                                                                      |
| 31                        | Raw EEG data after ICA     | 0.026 |   |
| 32                        | Delta brain wave (0.5-4Hz) | 0.029 |  |
| 33                        | Theta brain wave (4-8Hz)   | 0     | Nothing significant                                                                  |
| 34                        | Alpha brain wave (8-12Hz)  | 0     | Nothing significant                                                                  |
| 35                        | Beta brain wave 12-28Hz)   | 0     | Nothing significant                                                                  |
| 36                        | Gamma brain wave(28-40Hz)  | 0     | Nothing significant                                                                  |
| <b>37 Alpha asymmetry</b> |                            |       |                                                                                      |
|                           |                            | 0     | Nothing significant                                                                  |
| <b>38 Relative gamma</b>  |                            |       |                                                                                      |
|                           |                            | 0     | Nothing significant                                                                  |

| Huguchi fractal dimension      |                            |       |                                                                                      |
|--------------------------------|----------------------------|-------|--------------------------------------------------------------------------------------|
| 39                             | Raw EEG data after ICA     | 0     | Nothing significant                                                                  |
| 40                             | Delta brain wave (0.5-4Hz) | 0.008 | 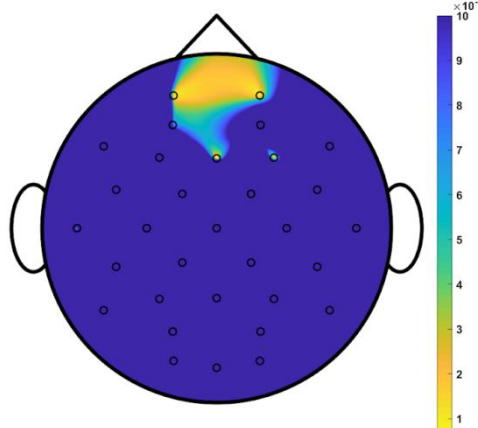   |
| 41                             | Theta brain wave (4-8Hz)   | 0.011 |   |
| 42                             | Alpha brain wave (8-12Hz)  | 0.007 |  |
| 43                             | Beta brain wave 12-28Hz)   | 0     | Nothing significant                                                                  |
| 44                             | Gamma brain wave(28-40Hz)  | 0     | Nothing significant                                                                  |
| Detrended fluctuation analysis |                            |       |                                                                                      |
| 45                             | Raw EEG data after ICA     | 0     | Nothing significant                                                                  |
| 46                             | Delta brain                | 0     | Nothing significant                                                                  |

|                 |                           |   |                     |
|-----------------|---------------------------|---|---------------------|
|                 | wave (0.5-4Hz)            |   |                     |
| 47              | Theta brain wave (4-8Hz)  | 0 | Nothing significant |
| 48              | Alpha brain wave (8-12Hz) | 0 | Nothing significant |
| 49              | Beta brain wave 12-28Hz)  | 0 | Nothing significant |
| 50              | Gamma brain wave(28-40Hz) | 0 | Nothing significant |
| Theta Asymmetry |                           |   |                     |
| 51              |                           | 0 | Nothing significant |

**Supplemental Table III.** Results of statistical analysis on the **task-based EEG data**. The column ‘p-value threshold’ contains the p-value threshold corresponding to the False Discovery Rate (FDR) threshold of 0.05. The ‘topoplots’ column contains topographical maps with p-values of each channel after FDR. The maps showcase the average difference in EEG activity corresponding to the “stickiness” trials (high and low stickiness combined) between individuals with higher and lower vulnerability to depression. p-value threshold corresponding to the False Discovery Rate (FDR) threshold of 0.05. The ‘topoplots’ column contains topographical maps with p-values of each channel after FDR. The maps showcase the average difference in EEG activity corresponding to the “stickiness” trials (high and low stickiness combined) between individuals with higher and lower vulnerability to depression.

| Feature                    | p-value threshold for FDR value of 0.05 | Topoplots                                                                            |
|----------------------------|-----------------------------------------|--------------------------------------------------------------------------------------|
| Raw EEG (data after ICA)   | 2.155e-04                               | 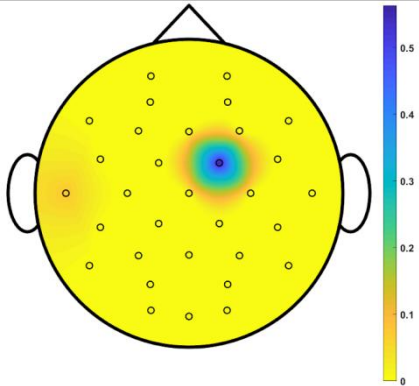 |
| Delta brain wave (0.5-4Hz) | 0.017                                   |  |



|                            |       |                                                                                    |
|----------------------------|-------|------------------------------------------------------------------------------------|
| Theta brain wave (4-8Hz)   | 0.029 | 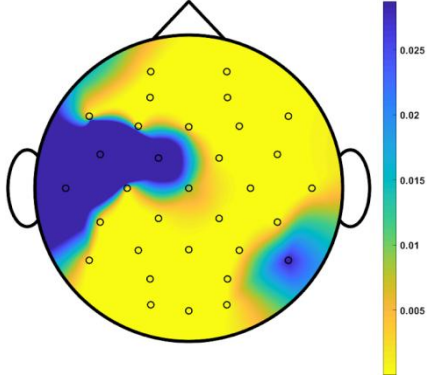 |
| Alpha brain wave (8-12Hz)  | 0     | Nothing significant                                                                |
| Beta brain wave (12-28Hz)  | 0     | Nothing significant                                                                |
| Gamma brain wave (28-40Hz) | 0     | Nothing significant                                                                |

**Supplement Table IV.** Results of statistical analysis on the brain waves of **task-based EEG data**. This table shows the average EEG differences in trials reported as “high/low” stickiness between individuals with higher and lower vulnerability to depression. The column ‘p-value threshold’ contains the p-value threshold corresponding to the False Discovery Rate (FDR) threshold of 0.05.

| <b>Feature</b><br>Mean difference in the two groups based on the EEG data from the reported high stickiness trials | <b>p-value threshold for FDR of 0.05</b> | <b>Topoplot</b>                                                                      |
|--------------------------------------------------------------------------------------------------------------------|------------------------------------------|--------------------------------------------------------------------------------------|
| Raw EEG data after ICA                                                                                             | 0.018                                    | 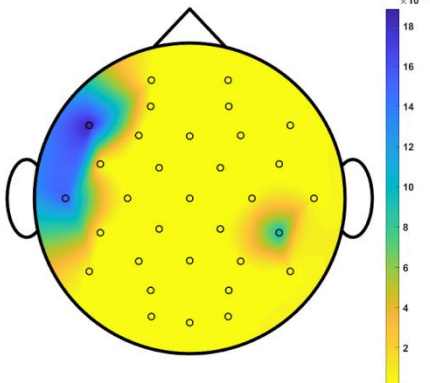 |
| Delta brain wave (0.5-4Hz)                                                                                         | 0.003                                    |  |

|                                                                                                               |                                          |                                                                                      |
|---------------------------------------------------------------------------------------------------------------|------------------------------------------|--------------------------------------------------------------------------------------|
| Theta brain wave (4-8Hz)                                                                                      | 0.014                                    | 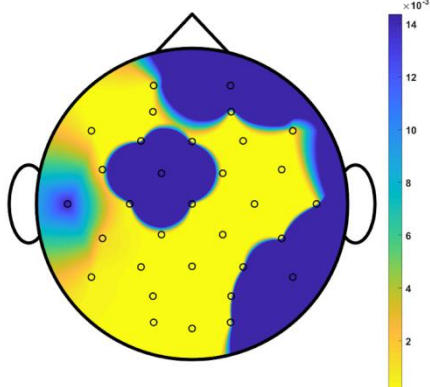   |
| Alpha brain wave (8-12Hz)                                                                                     | -                                        | Nothing significant                                                                  |
| Beta brain wave 12-28Hz)                                                                                      | -                                        | Nothing significant                                                                  |
| Gamma brain wave(28-40Hz)                                                                                     | -                                        | Nothing significant                                                                  |
| <b>Feature</b><br>Mean difference in the two groups based on the EEG data from reported low stickiness trials | <b>p-value threshold for FDR of 0.05</b> | <b>Topoplot</b>                                                                      |
| Raw EEG data after ICA                                                                                        | 0.012                                    |   |
| Delta brain wave (0.5-4Hz)                                                                                    | 6.421e-37                                |  |

|                           |       |                                                                                    |
|---------------------------|-------|------------------------------------------------------------------------------------|
| Theta brain wave (4-8Hz)  | 0.038 | 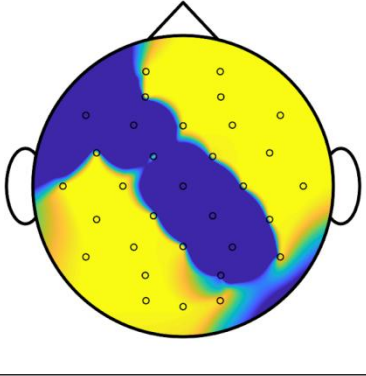 |
| Alpha brain wave (8-12Hz) | 0.012 |  |
| Beta brain wave 12-28Hz)  | -     | Nothing significant                                                                |
| Gamma brain wave(28-40Hz) | -     | Nothing significant                                                                |

**Supplement Table V.** Results of statistical analysis on the brain waves of **task-based EEG data**. This table shows the average differences in EEG activity between “high” and “low” stickiness trials for individuals within the two groups. The column ‘p-value threshold’ contains the p-value threshold corresponding to the False Discovery Rate (FDR) threshold of 0.05.

| S.no. | Feature<br>Mean difference in EEG activity corresponding to high vs low stickiness for individuals more vulnerable to depression | p-value threshold for FDR of 0.05 | Topoplot                                                                             |
|-------|----------------------------------------------------------------------------------------------------------------------------------|-----------------------------------|--------------------------------------------------------------------------------------|
| 1     | Raw EEG data after ICA                                                                                                           | 0.043                             | 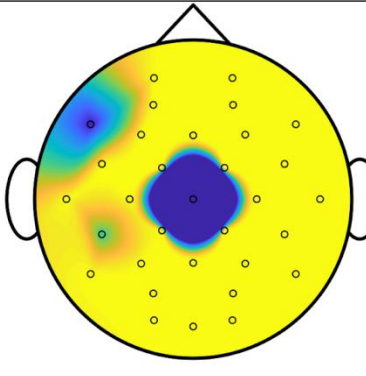 |

|              |                                                                                                                                         |                                          |                                                                                      |
|--------------|-----------------------------------------------------------------------------------------------------------------------------------------|------------------------------------------|--------------------------------------------------------------------------------------|
| 2            | Delta brain wave (0.5-4Hz)                                                                                                              | 0.007                                    | 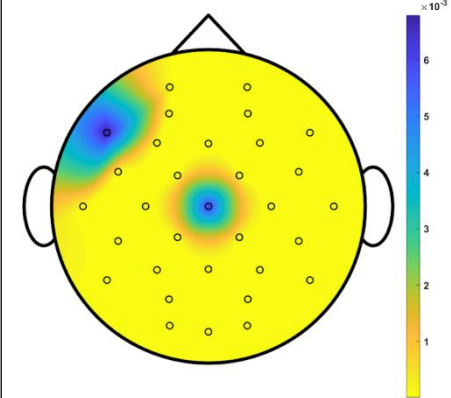   |
| 3            | Theta brain wave (4-8Hz)                                                                                                                | 0.015                                    |    |
| 4            | Alpha brain wave (8-12Hz)                                                                                                               | 3.632e-04                                | Nothing significant                                                                  |
| 5            | Beta brain wave 12-28Hz)                                                                                                                | -                                        | Nothing significant                                                                  |
| 6            | Gamma brain wave(28-40Hz)                                                                                                               | -                                        | Nothing significant                                                                  |
| <b>S.no.</b> | <b>Feature</b><br>Mean difference in EEG activity corresponding to high vs low stickiness for individuals less vulnerable to depression | <b>p-value threshold for FDR of 0.05</b> | <b>Topoplot</b>                                                                      |
| 1            | Raw EEG data after ICA                                                                                                                  | 1.281e-08                                |  |

|   |                            |       |                                                                                      |
|---|----------------------------|-------|--------------------------------------------------------------------------------------|
| 2 | Delta brain wave (0.5-4Hz) | 0.005 | 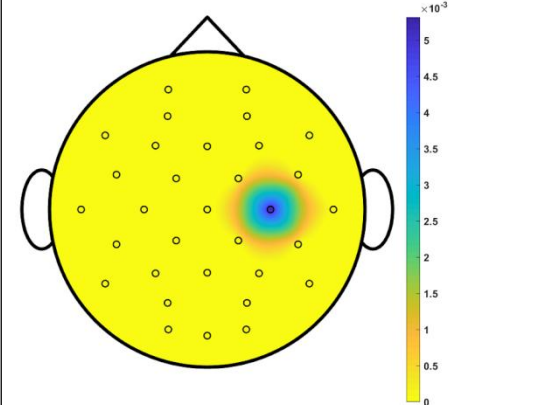   |
| 3 | Theta brain wave (4-8Hz)   | 0.003 |   |
| 4 | Alpha brain wave (8-12Hz)  | 0.016 |  |
| 5 | Beta brain wave 12-28Hz)   | -     | Nothing significant                                                                  |
| 6 | Gamma brain wave(28-40Hz)  | -     | Nothing significant                                                                  |

## Supplement Methods: Background on Classifiers

### Support Vector Machine (SVM)

It is a popular supervised learning algorithm that is used both for classification and regression. SVM plots the data points ( $x_1, x_2, \dots, x_n$ , 'n' being the number of features) in an n-dimensional space and finds a hyperplane or a set of hyperplanes that separates the support vectors by maximum distance. For handling non-linear data, kernel functions are beneficial. They allow mapping non-linear data to a higher dimension where they are linearly separable, which can then be classified by SVM.

### MultiLayer Perception (MLP)

This classifier comprises of an input layer consisting of 'n+1' neurons (data ( $x_1, x_2, \dots, x_n$ ) and a bias 'b'), 'l' hidden layer neurons and 'c' output layer neurons ('c' being the total classes in the dataset). Each neuron in a layer is a weighted sum of inputs from the previous layer followed by a non-linear activation function, eg for Suppl Fig. 1 ( $h_i = \tanh(w_1*x_1 + w_2*x_2 + \dots + w_n*x_n + b_1*w_0)$ ).

Output (Y) is determined at the last layer and error or loss is evaluated using the ground truth (Y') for each data point. Backpropagation algorithm [1] uses these errors to train MLP i.e. finetune the weights to optimize classification performance.

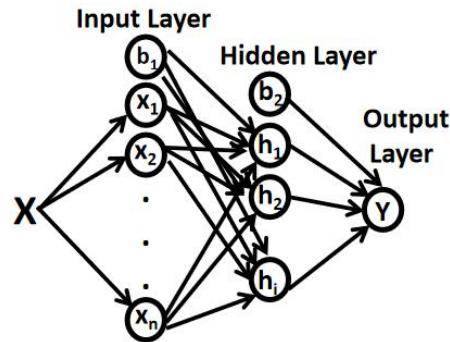

Suppl Figure 1. A multilayer perceptron

### Random Forest (RF)

It is an ensemble technique that makes use of many decision trees for classification. Many decision trees are trained independently and the final decision of the RF is based on consensus. During the training phase, each decision tree's training set is created by random sampling. Addition of more decision trees decreases the variance in the model, however if the correlation between any decision trees increases, the error rate of the model also increases [2]. Thus, number of decision trees forming a forest is also a hyperparameter. Using many decision trees for classification, a RF classifier is good at dealing with noisy and missing data.

### 1D - Convolutional Neural Network (CNN)

CNNs are rooted in image processing as they were primarily used for image classification. They are known to capture the spatial features in data using a kernel that makes it robust at detecting distribution of colours, detect edges, etc. However they are no longer limited to handling images. 1d - CNNs, are suitable to work with time series data as their kernel moves along one dimension. CNNs typically consist of a convolutional layer (learns the features from the input), pooling layer (reduces the size of the feature maps while preserving important features), and fully connected layers (connecting the previous layer to the output neurons).

### Long Short Term Memory (LSTM)

It is a recurrent neural network that tracks long-term dependencies in the input data leading it to predict the time-series data well. A basic LSTM unit consists of memory cells where each cell comprises of 3 gates, namely input, output and forget gate. The cell is responsible for handling the long term dependency while the three gates regulates the flow of values between the different layers of the LSTM network. The basic architecture of a single LSTM cell is as shown in (Suppl Fig. 2), where  $x^t, c^t, h^t, c^{t-1}$  and  $h^{t-1}$  represent the previous input, current cell state, current output, previous cell state and the previous output, respectively.  $\sigma$  represents the sigmoid activation function, whereas '\*' and '+' represent the mathematical operations of multiplication and addition, respectively.  $f_t, i_t$  and  $o_t$  represent the forget, input and output gate respectively.

The forget gate decides what previous information should be forgotten. Its output is formalised in Suppl equation (1).

$$f_t = \sigma(x_t * U_f + h_{t-1} * w_f) \quad \text{Suppl (1)}$$

Where  $U_f$  and  $w_f$  denote the weight associated with the input and hidden state respectively.

The input gate is used to quantify the importance of the new information brought in by the input. It is represented by Suppl equation (2).

$$i_t = \sigma(x_t * U_i + h_{t-1} * w_i) \quad \text{Suppl (2)}$$

$U_i$  and  $w_i$  represent the weights associated with the input and the hidden state respectively.

The output gate is represented by Suppl equation (3).

$$o_t = \sigma(x_t * U_o + h_{t-1} * w_o) \quad \text{Suppl (3)}$$

$U_o$  and  $w_o$  represent the weights associated with the input and the hidden state respectively

The current hidden state  $h_t$  is given by Suppl equation (4)

$$h_t = \tanh(c_t) * o_t \quad \text{Suppl (4)}$$

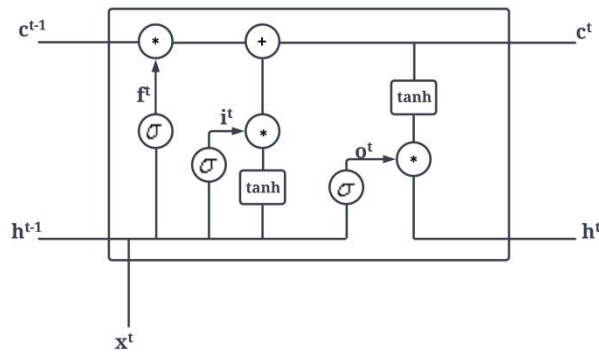

Suppl Figure 2. A LSTM cell in our network

## Supplement Methods: Hyperparameter tuning

1. We tried running various models with different permutations of layers, regularizers, optimizers, batch size, window size and activation function. Details of the experiments conducted for machine/deep learning:

### LSTM:

1. Layers: LSTM layers ranging from 1-5 with units in each layer ranging from 1024-32. Each consequent layer had a step down in power of 2 for the units. For example if the first layer had 512 units, the consequent LSTM layers will have 256, 64, 32, and 16 units respectively for 5 layered LSTM. For a four layered LSTM model we experimented with 256, 64, 32 and 16 units in each layer respectively. Similarly we experimented with addition of 3-1 dense layers with neurons ranging from 16, 8, and 4.
2. Timestep/window size of 64, 32 and 16.
3. Dropout rates of 0.5, 0.4, 0.3, and 0.2
4. Inclusion and exclusion of batch normalization
5. RMSProp and Adam optimizers
6. Activations 'tanh' and 'sigmoid' for the dense layers.

### CNN:

7. CNN layers ranging from 3-1 with 1024-64 filters and kernel size of 5 and 7.
8. Timestep/window size of 64, 32 and 16.
9. Dropout rates of 0.5, 0.4, 0.3, and 0.2
10. Inclusion and exclusion of batch normalization
11. RMSProp and Adam optimizers
12. Activations 'tanh' and 'sigmoid' for the dense layers.

### DT:

1. Number of decision trees ranging from 60-10 and their maximum depth ranging from 32-3

### MLP:

1. A 2, 3-layer MLP with neurons in each layer ranging from 64-4.
2. Batch size of 64 and 32.
3. SGD and Adam optimisers.
4. Learning rate: 0.001, 0.0001

## Supplement Methods: Evolutionary Algorithms Particle Swarm Optimization (PSO)

- Number of particles: 10
- Maximum iterations:40
- Transfer function,  $T(x)$ :

$$T(x) = \left| \frac{2}{\pi} \arctan\left(\frac{\pi}{2} x\right) \right|$$

This transfer function gave the best results in [4] and hence has been used for our work as well.

### Gray Wolf Optimization(GWO)

- Number of wolves: 50
- Maximum iterations: 100
- Transfer function, T(x):

$$\frac{1}{1 + e^{-10 \cdot X - 0.5}}$$

This transfer function, mentioned as bGWO<sub>2</sub> in [3] gave the best results for binary classification using GWO and hence, has been used for this study as well.

### Genetic Algorithm (GA)

- Number of genes: 150
- Maximum iterations: 30
- Crossover rate: 0.8
- Mutation rate: 0.1
- Elite rate: 0.2
- Roulette selection

### Supplement Methods: Feature Extraction

#### Discrete wavelet transform:

The DWT is done by obtaining the Approximation (A) and Detail (D) coefficients by performing decomposition at various levels. It is done through the use of low and high pass filters at various levels. The low pass filter (L) ignores the high-frequency fluctuations and helps in preserving the low-frequency trends. Similarly, the high pass filter (H) helps in keeping the high-frequency fluctuations and ignoring the slow trends in the signal. The outcomes from the low pass filters help in forming the approximation coefficients, and those from the high pass filters help in forming the detailed coefficients. The Daubechies (Db)-8 wavelet transform has been used in this work. Hence the levels of decomposition are 8.

$$\int_{-\infty}^{\infty} \psi(t) dt = 0 \quad (1)$$

$$\psi_{m,n}(t) = a_0^{-m/2} \psi(a_0^m t - nb_0) \quad (2)$$

The scaling and wavelet functions required for the evaluation A and D coefficients are given in (3) and (4), respectively.

$$\phi_{p,q}(t) = 2^{p/2} h(2^p t - q) \quad (3)$$

$$\omega_{p,q}(t) = 2^{p/2} g(2^p t - q) \quad (4)$$

The A<sub>i</sub> and D<sub>i</sub> coefficients at the i<sup>th</sup> level are evaluated using (5) and (6), respectively.

$$A_i = \frac{1}{\sqrt{T}} \sum_t x(t) \phi_{p,q}(t) \quad (5)$$

$$D_i = \frac{1}{\sqrt{T}} \sum_t x(t) \omega_{p,q}(t) \quad (6)$$

The Db-8 decomposition gives the remaining four wavelet coefficients that correspond to noise and five wavelet coefficients corresponding to alpha, beta, delta, gamma and theta brain waves.

### Correlation

The Pearson correlation coefficient assesses the extent of linear dependency between two electrode channels in the time domain. It is one of the simplest metrics for non-directed model-based interactions. It is mathematically defined as:

$$Corr_{xy} = \frac{Cov(x, y)}{\sigma_x \sigma_y} \quad (7)$$



where  $\text{Cov}(x, y)$  denotes the co-variance between electrodes  $x$  and  $y$ , and  $\sigma_x$  and  $\sigma_y$  denote the electrodes' standard deviations, respectively. The higher the absolute value of  $\text{Corr}_{xy}$ , the stronger will be the correlation.

### Coherence

It is a widely used metric used to quantify phase synchronicity between a pair of signals. It is the spectral cross-correlation between them, normalized by their power spectrum. The value of coherence defines the level of linear interdependence between two signals. It is mathematically computed as:

$$\text{Coh}_{xy}(f) = \frac{|\frac{1}{n} \sum_{k=1}^n Ax(f, k)Ay(f, k)e^{i(\varphi_x(f, k) - \varphi_y(f, k))}|}{\sqrt{(\frac{1}{n} \sum_{k=1}^n A_x^2(f, k)) (\frac{1}{n} \sum_{k=1}^n A_y^2(f, k))}} \quad (8)$$

where  $n$  symbolizes the number of data points in an experiment,  $A$  is the amplitude, and  $\varphi$  is the phase of the signal. The numerator term on a single trial is represented by the cross-spectral density of the signals  $x$  and  $y$  at frequency  $f$ . The square root of the product of the power estimations on a single trial of the signals  $x$  and  $y$  at frequency  $f$  is represented in the denominator. It can be concisely represented as:

$$\text{Coh}_{xy}(f) = \frac{|S_{xy}(f)|}{\sqrt{S_{xx}(f)S_{yy}(f)}} \quad (9)$$

where  $S_{xy}(f)$  is the signal's cross-spectral density, and  $S_{xx}(f)$  and  $S_{yy}(f)$  are the signal's power spectral density, respectively.

### Phase Locking Value

PLV can be defined as the coherence of amplitude-normalized Fourier-transformed signals. It is based on the assumption that signal amplitude and phase are statistically independent. Hence, only phase synchronization is employed to determine a probable functional connection between two channels of EEG recordings. The value of PLV can be obtained by putting  $A_x(\cdot) = A_y(\cdot) = 1$  in the Eq. (8):

$$\text{PLV}_{xy}(f) = \frac{|\frac{1}{n} \sum_{k=1}^n 1x(f, k)1y(f, k)e^{i(\varphi_x(f, k) - \varphi_y(f, k))}|}{\sqrt{(\frac{1}{n} \sum_{k=1}^n 1_x^2(f, k)) (\frac{1}{n} \sum_{k=1}^n 1_y^2(f, k))}} \quad (10)$$

$$= \left| \frac{1}{n} \sum_{k=1}^n e^{i(\varphi_x(f, k) - \varphi_y(f, k))} \right| \quad (11)$$

PLV has a value between 0 and 1, with 0 indicating no synchronization and 1 indicating full-phase synchronization.

### Phase Lag Index

PLI is a metric for the asymmetry of phase difference distributions between two EEG signals. By ignoring zero and  $\pi$  phase disparities, it aims at minimizing the effect of volume conduction in phase synchronization measurement. It determines the asymmetry of the distribution of instantaneous phase differences using the Hilbert transformation. A time series of phase differences  $\Delta\phi(t_k)$ ,  $k = 1 \dots N$  can be used to calculate an index of the asymmetry of the phase difference distribution using:

$$\text{PLI}_{xy}(f) = \left| \frac{1}{n} \sum_{k=1}^n \text{sign}[\Delta\phi t_k] \right| \quad (12)$$

The  $\text{PLI}_{xy}(f)$  value ranges from 0 to 1, with 1 denoting perfect phase synchronization and 0 denoting no coupling or coupling with a phase discrepancy centered around  $0 \bmod \pi$ .

## Supplement Results

**Supplement Table VI.** The confusion matrices for **rs-EEG classification** results using 1D-CNN, LSTM and BLSTM results using 1D-CNN, LSTM and BLSTM

|                         | 1D-CNN                                                                                                                                                                                                                                                                                                                 | LSTM            | BLSTM           |                 |                 |       |       |                 |      |       |  |                 |                 |                                                                                                                                                                                                                                                                                                                        |            |                 |                 |                 |       |       |                 |      |       |  |                 |                 |                                                                                                                                                                                                                                                                                                                        |            |                 |                 |                 |       |       |                 |      |       |  |                 |                 |
|-------------------------|------------------------------------------------------------------------------------------------------------------------------------------------------------------------------------------------------------------------------------------------------------------------------------------------------------------------|-----------------|-----------------|-----------------|-----------------|-------|-------|-----------------|------|-------|--|-----------------|-----------------|------------------------------------------------------------------------------------------------------------------------------------------------------------------------------------------------------------------------------------------------------------------------------------------------------------------------|------------|-----------------|-----------------|-----------------|-------|-------|-----------------|------|-------|--|-----------------|-----------------|------------------------------------------------------------------------------------------------------------------------------------------------------------------------------------------------------------------------------------------------------------------------------------------------------------------------|------------|-----------------|-----------------|-----------------|-------|-------|-----------------|------|-------|--|-----------------|-----------------|
| <b>Raw</b>              | <table border="1"> <tr> <td>True value</td> <td>Less vulnerable</td> <td>More vulnerable</td> </tr> <tr> <td>Less vulnerable</td> <td>46124</td> <td>1000</td> </tr> <tr> <td>More vulnerable</td> <td>800</td> <td>44993</td> </tr> <tr> <td></td> <td>Less vulnerable</td> <td>More vulnerable</td> </tr> </table>   | True value      | Less vulnerable | More vulnerable | Less vulnerable | 46124 | 1000  | More vulnerable | 800  | 44993 |  | Less vulnerable | More vulnerable | <table border="1"> <tr> <td>True value</td> <td>Less vulnerable</td> <td>More vulnerable</td> </tr> <tr> <td>Less vulnerable</td> <td>46024</td> <td>1100</td> </tr> <tr> <td>More vulnerable</td> <td>800</td> <td>44993</td> </tr> <tr> <td></td> <td>Less vulnerable</td> <td>More vulnerable</td> </tr> </table>   | True value | Less vulnerable | More vulnerable | Less vulnerable | 46024 | 1100  | More vulnerable | 800  | 44993 |  | Less vulnerable | More vulnerable | <table border="1"> <tr> <td>True value</td> <td>Less vulnerable</td> <td>More vulnerable</td> </tr> <tr> <td>Less vulnerable</td> <td>46099</td> <td>1025</td> </tr> <tr> <td>More vulnerable</td> <td>800</td> <td>44993</td> </tr> <tr> <td></td> <td>Less vulnerable</td> <td>More vulnerable</td> </tr> </table>   | True value | Less vulnerable | More vulnerable | Less vulnerable | 46099 | 1025  | More vulnerable | 800  | 44993 |  | Less vulnerable | More vulnerable |
| True value              | Less vulnerable                                                                                                                                                                                                                                                                                                        | More vulnerable |                 |                 |                 |       |       |                 |      |       |  |                 |                 |                                                                                                                                                                                                                                                                                                                        |            |                 |                 |                 |       |       |                 |      |       |  |                 |                 |                                                                                                                                                                                                                                                                                                                        |            |                 |                 |                 |       |       |                 |      |       |  |                 |                 |
| Less vulnerable         | 46124                                                                                                                                                                                                                                                                                                                  | 1000            |                 |                 |                 |       |       |                 |      |       |  |                 |                 |                                                                                                                                                                                                                                                                                                                        |            |                 |                 |                 |       |       |                 |      |       |  |                 |                 |                                                                                                                                                                                                                                                                                                                        |            |                 |                 |                 |       |       |                 |      |       |  |                 |                 |
| More vulnerable         | 800                                                                                                                                                                                                                                                                                                                    | 44993           |                 |                 |                 |       |       |                 |      |       |  |                 |                 |                                                                                                                                                                                                                                                                                                                        |            |                 |                 |                 |       |       |                 |      |       |  |                 |                 |                                                                                                                                                                                                                                                                                                                        |            |                 |                 |                 |       |       |                 |      |       |  |                 |                 |
|                         | Less vulnerable                                                                                                                                                                                                                                                                                                        | More vulnerable |                 |                 |                 |       |       |                 |      |       |  |                 |                 |                                                                                                                                                                                                                                                                                                                        |            |                 |                 |                 |       |       |                 |      |       |  |                 |                 |                                                                                                                                                                                                                                                                                                                        |            |                 |                 |                 |       |       |                 |      |       |  |                 |                 |
| True value              | Less vulnerable                                                                                                                                                                                                                                                                                                        | More vulnerable |                 |                 |                 |       |       |                 |      |       |  |                 |                 |                                                                                                                                                                                                                                                                                                                        |            |                 |                 |                 |       |       |                 |      |       |  |                 |                 |                                                                                                                                                                                                                                                                                                                        |            |                 |                 |                 |       |       |                 |      |       |  |                 |                 |
| Less vulnerable         | 46024                                                                                                                                                                                                                                                                                                                  | 1100            |                 |                 |                 |       |       |                 |      |       |  |                 |                 |                                                                                                                                                                                                                                                                                                                        |            |                 |                 |                 |       |       |                 |      |       |  |                 |                 |                                                                                                                                                                                                                                                                                                                        |            |                 |                 |                 |       |       |                 |      |       |  |                 |                 |
| More vulnerable         | 800                                                                                                                                                                                                                                                                                                                    | 44993           |                 |                 |                 |       |       |                 |      |       |  |                 |                 |                                                                                                                                                                                                                                                                                                                        |            |                 |                 |                 |       |       |                 |      |       |  |                 |                 |                                                                                                                                                                                                                                                                                                                        |            |                 |                 |                 |       |       |                 |      |       |  |                 |                 |
|                         | Less vulnerable                                                                                                                                                                                                                                                                                                        | More vulnerable |                 |                 |                 |       |       |                 |      |       |  |                 |                 |                                                                                                                                                                                                                                                                                                                        |            |                 |                 |                 |       |       |                 |      |       |  |                 |                 |                                                                                                                                                                                                                                                                                                                        |            |                 |                 |                 |       |       |                 |      |       |  |                 |                 |
| True value              | Less vulnerable                                                                                                                                                                                                                                                                                                        | More vulnerable |                 |                 |                 |       |       |                 |      |       |  |                 |                 |                                                                                                                                                                                                                                                                                                                        |            |                 |                 |                 |       |       |                 |      |       |  |                 |                 |                                                                                                                                                                                                                                                                                                                        |            |                 |                 |                 |       |       |                 |      |       |  |                 |                 |
| Less vulnerable         | 46099                                                                                                                                                                                                                                                                                                                  | 1025            |                 |                 |                 |       |       |                 |      |       |  |                 |                 |                                                                                                                                                                                                                                                                                                                        |            |                 |                 |                 |       |       |                 |      |       |  |                 |                 |                                                                                                                                                                                                                                                                                                                        |            |                 |                 |                 |       |       |                 |      |       |  |                 |                 |
| More vulnerable         | 800                                                                                                                                                                                                                                                                                                                    | 44993           |                 |                 |                 |       |       |                 |      |       |  |                 |                 |                                                                                                                                                                                                                                                                                                                        |            |                 |                 |                 |       |       |                 |      |       |  |                 |                 |                                                                                                                                                                                                                                                                                                                        |            |                 |                 |                 |       |       |                 |      |       |  |                 |                 |
|                         | Less vulnerable                                                                                                                                                                                                                                                                                                        | More vulnerable |                 |                 |                 |       |       |                 |      |       |  |                 |                 |                                                                                                                                                                                                                                                                                                                        |            |                 |                 |                 |       |       |                 |      |       |  |                 |                 |                                                                                                                                                                                                                                                                                                                        |            |                 |                 |                 |       |       |                 |      |       |  |                 |                 |
| <b>Delta (0.5-4 Hz)</b> | <table border="1"> <tr> <td>True label</td> <td>Less vulnerable</td> <td>More vulnerable</td> </tr> <tr> <td>Less vulnerable</td> <td>43784</td> <td>2940</td> </tr> <tr> <td>More vulnerable</td> <td>2219</td> <td>44174</td> </tr> <tr> <td></td> <td>Less vulnerable</td> <td>More vulnerable</td> </tr> </table>  | True label      | Less vulnerable | More vulnerable | Less vulnerable | 43784 | 2940  | More vulnerable | 2219 | 44174 |  | Less vulnerable | More vulnerable | <table border="1"> <tr> <td>True label</td> <td>Less vulnerable</td> <td>More vulnerable</td> </tr> <tr> <td>Less vulnerable</td> <td>40766</td> <td>5958</td> </tr> <tr> <td>More vulnerable</td> <td>165</td> <td>46228</td> </tr> <tr> <td></td> <td>Less vulnerable</td> <td>More vulnerable</td> </tr> </table>   | True label | Less vulnerable | More vulnerable | Less vulnerable | 40766 | 5958  | More vulnerable | 165  | 46228 |  | Less vulnerable | More vulnerable | <table border="1"> <tr> <td>True label</td> <td>Less vulnerable</td> <td>More vulnerable</td> </tr> <tr> <td>Less vulnerable</td> <td>46229</td> <td>164</td> </tr> <tr> <td>More vulnerable</td> <td>5959</td> <td>40765</td> </tr> <tr> <td></td> <td>Less vulnerable</td> <td>More vulnerable</td> </tr> </table>   | True label | Less vulnerable | More vulnerable | Less vulnerable | 46229 | 164   | More vulnerable | 5959 | 40765 |  | Less vulnerable | More vulnerable |
| True label              | Less vulnerable                                                                                                                                                                                                                                                                                                        | More vulnerable |                 |                 |                 |       |       |                 |      |       |  |                 |                 |                                                                                                                                                                                                                                                                                                                        |            |                 |                 |                 |       |       |                 |      |       |  |                 |                 |                                                                                                                                                                                                                                                                                                                        |            |                 |                 |                 |       |       |                 |      |       |  |                 |                 |
| Less vulnerable         | 43784                                                                                                                                                                                                                                                                                                                  | 2940            |                 |                 |                 |       |       |                 |      |       |  |                 |                 |                                                                                                                                                                                                                                                                                                                        |            |                 |                 |                 |       |       |                 |      |       |  |                 |                 |                                                                                                                                                                                                                                                                                                                        |            |                 |                 |                 |       |       |                 |      |       |  |                 |                 |
| More vulnerable         | 2219                                                                                                                                                                                                                                                                                                                   | 44174           |                 |                 |                 |       |       |                 |      |       |  |                 |                 |                                                                                                                                                                                                                                                                                                                        |            |                 |                 |                 |       |       |                 |      |       |  |                 |                 |                                                                                                                                                                                                                                                                                                                        |            |                 |                 |                 |       |       |                 |      |       |  |                 |                 |
|                         | Less vulnerable                                                                                                                                                                                                                                                                                                        | More vulnerable |                 |                 |                 |       |       |                 |      |       |  |                 |                 |                                                                                                                                                                                                                                                                                                                        |            |                 |                 |                 |       |       |                 |      |       |  |                 |                 |                                                                                                                                                                                                                                                                                                                        |            |                 |                 |                 |       |       |                 |      |       |  |                 |                 |
| True label              | Less vulnerable                                                                                                                                                                                                                                                                                                        | More vulnerable |                 |                 |                 |       |       |                 |      |       |  |                 |                 |                                                                                                                                                                                                                                                                                                                        |            |                 |                 |                 |       |       |                 |      |       |  |                 |                 |                                                                                                                                                                                                                                                                                                                        |            |                 |                 |                 |       |       |                 |      |       |  |                 |                 |
| Less vulnerable         | 40766                                                                                                                                                                                                                                                                                                                  | 5958            |                 |                 |                 |       |       |                 |      |       |  |                 |                 |                                                                                                                                                                                                                                                                                                                        |            |                 |                 |                 |       |       |                 |      |       |  |                 |                 |                                                                                                                                                                                                                                                                                                                        |            |                 |                 |                 |       |       |                 |      |       |  |                 |                 |
| More vulnerable         | 165                                                                                                                                                                                                                                                                                                                    | 46228           |                 |                 |                 |       |       |                 |      |       |  |                 |                 |                                                                                                                                                                                                                                                                                                                        |            |                 |                 |                 |       |       |                 |      |       |  |                 |                 |                                                                                                                                                                                                                                                                                                                        |            |                 |                 |                 |       |       |                 |      |       |  |                 |                 |
|                         | Less vulnerable                                                                                                                                                                                                                                                                                                        | More vulnerable |                 |                 |                 |       |       |                 |      |       |  |                 |                 |                                                                                                                                                                                                                                                                                                                        |            |                 |                 |                 |       |       |                 |      |       |  |                 |                 |                                                                                                                                                                                                                                                                                                                        |            |                 |                 |                 |       |       |                 |      |       |  |                 |                 |
| True label              | Less vulnerable                                                                                                                                                                                                                                                                                                        | More vulnerable |                 |                 |                 |       |       |                 |      |       |  |                 |                 |                                                                                                                                                                                                                                                                                                                        |            |                 |                 |                 |       |       |                 |      |       |  |                 |                 |                                                                                                                                                                                                                                                                                                                        |            |                 |                 |                 |       |       |                 |      |       |  |                 |                 |
| Less vulnerable         | 46229                                                                                                                                                                                                                                                                                                                  | 164             |                 |                 |                 |       |       |                 |      |       |  |                 |                 |                                                                                                                                                                                                                                                                                                                        |            |                 |                 |                 |       |       |                 |      |       |  |                 |                 |                                                                                                                                                                                                                                                                                                                        |            |                 |                 |                 |       |       |                 |      |       |  |                 |                 |
| More vulnerable         | 5959                                                                                                                                                                                                                                                                                                                   | 40765           |                 |                 |                 |       |       |                 |      |       |  |                 |                 |                                                                                                                                                                                                                                                                                                                        |            |                 |                 |                 |       |       |                 |      |       |  |                 |                 |                                                                                                                                                                                                                                                                                                                        |            |                 |                 |                 |       |       |                 |      |       |  |                 |                 |
|                         | Less vulnerable                                                                                                                                                                                                                                                                                                        | More vulnerable |                 |                 |                 |       |       |                 |      |       |  |                 |                 |                                                                                                                                                                                                                                                                                                                        |            |                 |                 |                 |       |       |                 |      |       |  |                 |                 |                                                                                                                                                                                                                                                                                                                        |            |                 |                 |                 |       |       |                 |      |       |  |                 |                 |
| <b>Theta (4-8 Hz)</b>   | <table border="1"> <tr> <td>True label</td> <td>Less vulnerable</td> <td>More vulnerable</td> </tr> <tr> <td>Less vulnerable</td> <td>31724</td> <td>15000</td> </tr> <tr> <td>More vulnerable</td> <td>9957</td> <td>36436</td> </tr> <tr> <td></td> <td>Less vulnerable</td> <td>More vulnerable</td> </tr> </table> | True label      | Less vulnerable | More vulnerable | Less vulnerable | 31724 | 15000 | More vulnerable | 9957 | 36436 |  | Less vulnerable | More vulnerable | <table border="1"> <tr> <td>True label</td> <td>Less vulnerable</td> <td>More vulnerable</td> </tr> <tr> <td>Less vulnerable</td> <td>29222</td> <td>17502</td> </tr> <tr> <td>More vulnerable</td> <td>8698</td> <td>37695</td> </tr> <tr> <td></td> <td>Less vulnerable</td> <td>More vulnerable</td> </tr> </table> | True label | Less vulnerable | More vulnerable | Less vulnerable | 29222 | 17502 | More vulnerable | 8698 | 37695 |  | Less vulnerable | More vulnerable | <table border="1"> <tr> <td>True label</td> <td>Less vulnerable</td> <td>More vulnerable</td> </tr> <tr> <td>Less vulnerable</td> <td>30763</td> <td>15961</td> </tr> <tr> <td>More vulnerable</td> <td>9896</td> <td>36497</td> </tr> <tr> <td></td> <td>Less vulnerable</td> <td>More vulnerable</td> </tr> </table> | True label | Less vulnerable | More vulnerable | Less vulnerable | 30763 | 15961 | More vulnerable | 9896 | 36497 |  | Less vulnerable | More vulnerable |
| True label              | Less vulnerable                                                                                                                                                                                                                                                                                                        | More vulnerable |                 |                 |                 |       |       |                 |      |       |  |                 |                 |                                                                                                                                                                                                                                                                                                                        |            |                 |                 |                 |       |       |                 |      |       |  |                 |                 |                                                                                                                                                                                                                                                                                                                        |            |                 |                 |                 |       |       |                 |      |       |  |                 |                 |
| Less vulnerable         | 31724                                                                                                                                                                                                                                                                                                                  | 15000           |                 |                 |                 |       |       |                 |      |       |  |                 |                 |                                                                                                                                                                                                                                                                                                                        |            |                 |                 |                 |       |       |                 |      |       |  |                 |                 |                                                                                                                                                                                                                                                                                                                        |            |                 |                 |                 |       |       |                 |      |       |  |                 |                 |
| More vulnerable         | 9957                                                                                                                                                                                                                                                                                                                   | 36436           |                 |                 |                 |       |       |                 |      |       |  |                 |                 |                                                                                                                                                                                                                                                                                                                        |            |                 |                 |                 |       |       |                 |      |       |  |                 |                 |                                                                                                                                                                                                                                                                                                                        |            |                 |                 |                 |       |       |                 |      |       |  |                 |                 |
|                         | Less vulnerable                                                                                                                                                                                                                                                                                                        | More vulnerable |                 |                 |                 |       |       |                 |      |       |  |                 |                 |                                                                                                                                                                                                                                                                                                                        |            |                 |                 |                 |       |       |                 |      |       |  |                 |                 |                                                                                                                                                                                                                                                                                                                        |            |                 |                 |                 |       |       |                 |      |       |  |                 |                 |
| True label              | Less vulnerable                                                                                                                                                                                                                                                                                                        | More vulnerable |                 |                 |                 |       |       |                 |      |       |  |                 |                 |                                                                                                                                                                                                                                                                                                                        |            |                 |                 |                 |       |       |                 |      |       |  |                 |                 |                                                                                                                                                                                                                                                                                                                        |            |                 |                 |                 |       |       |                 |      |       |  |                 |                 |
| Less vulnerable         | 29222                                                                                                                                                                                                                                                                                                                  | 17502           |                 |                 |                 |       |       |                 |      |       |  |                 |                 |                                                                                                                                                                                                                                                                                                                        |            |                 |                 |                 |       |       |                 |      |       |  |                 |                 |                                                                                                                                                                                                                                                                                                                        |            |                 |                 |                 |       |       |                 |      |       |  |                 |                 |
| More vulnerable         | 8698                                                                                                                                                                                                                                                                                                                   | 37695           |                 |                 |                 |       |       |                 |      |       |  |                 |                 |                                                                                                                                                                                                                                                                                                                        |            |                 |                 |                 |       |       |                 |      |       |  |                 |                 |                                                                                                                                                                                                                                                                                                                        |            |                 |                 |                 |       |       |                 |      |       |  |                 |                 |
|                         | Less vulnerable                                                                                                                                                                                                                                                                                                        | More vulnerable |                 |                 |                 |       |       |                 |      |       |  |                 |                 |                                                                                                                                                                                                                                                                                                                        |            |                 |                 |                 |       |       |                 |      |       |  |                 |                 |                                                                                                                                                                                                                                                                                                                        |            |                 |                 |                 |       |       |                 |      |       |  |                 |                 |
| True label              | Less vulnerable                                                                                                                                                                                                                                                                                                        | More vulnerable |                 |                 |                 |       |       |                 |      |       |  |                 |                 |                                                                                                                                                                                                                                                                                                                        |            |                 |                 |                 |       |       |                 |      |       |  |                 |                 |                                                                                                                                                                                                                                                                                                                        |            |                 |                 |                 |       |       |                 |      |       |  |                 |                 |
| Less vulnerable         | 30763                                                                                                                                                                                                                                                                                                                  | 15961           |                 |                 |                 |       |       |                 |      |       |  |                 |                 |                                                                                                                                                                                                                                                                                                                        |            |                 |                 |                 |       |       |                 |      |       |  |                 |                 |                                                                                                                                                                                                                                                                                                                        |            |                 |                 |                 |       |       |                 |      |       |  |                 |                 |
| More vulnerable         | 9896                                                                                                                                                                                                                                                                                                                   | 36497           |                 |                 |                 |       |       |                 |      |       |  |                 |                 |                                                                                                                                                                                                                                                                                                                        |            |                 |                 |                 |       |       |                 |      |       |  |                 |                 |                                                                                                                                                                                                                                                                                                                        |            |                 |                 |                 |       |       |                 |      |       |  |                 |                 |
|                         | Less vulnerable                                                                                                                                                                                                                                                                                                        | More vulnerable |                 |                 |                 |       |       |                 |      |       |  |                 |                 |                                                                                                                                                                                                                                                                                                                        |            |                 |                 |                 |       |       |                 |      |       |  |                 |                 |                                                                                                                                                                                                                                                                                                                        |            |                 |                 |                 |       |       |                 |      |       |  |                 |                 |
| <b>Alpha (8-12 Hz)</b>  | <table border="1"> <tr> <td>True label</td> <td>Less vulnerable</td> <td>More vulnerable</td> </tr> <tr> <td>Less vulnerable</td> <td>29275</td> <td>17449</td> </tr> <tr> <td>More vulnerable</td> <td>6321</td> <td>40072</td> </tr> <tr> <td></td> <td>Less vulnerable</td> <td>More vulnerable</td> </tr> </table> | True label      | Less vulnerable | More vulnerable | Less vulnerable | 29275 | 17449 | More vulnerable | 6321 | 40072 |  | Less vulnerable | More vulnerable | <table border="1"> <tr> <td>True label</td> <td>Less vulnerable</td> <td>More vulnerable</td> </tr> <tr> <td>Less vulnerable</td> <td>30306</td> <td>16418</td> </tr> <tr> <td>More vulnerable</td> <td>9098</td> <td>37295</td> </tr> <tr> <td></td> <td>Less vulnerable</td> <td>More vulnerable</td> </tr> </table> | True label | Less vulnerable | More vulnerable | Less vulnerable | 30306 | 16418 | More vulnerable | 9098 | 37295 |  | Less vulnerable | More vulnerable | <table border="1"> <tr> <td>True label</td> <td>Less vulnerable</td> <td>More vulnerable</td> </tr> <tr> <td>Less vulnerable</td> <td>30016</td> <td>16708</td> </tr> <tr> <td>More vulnerable</td> <td>9470</td> <td>36923</td> </tr> <tr> <td></td> <td>Less vulnerable</td> <td>More vulnerable</td> </tr> </table> | True label | Less vulnerable | More vulnerable | Less vulnerable | 30016 | 16708 | More vulnerable | 9470 | 36923 |  | Less vulnerable | More vulnerable |
| True label              | Less vulnerable                                                                                                                                                                                                                                                                                                        | More vulnerable |                 |                 |                 |       |       |                 |      |       |  |                 |                 |                                                                                                                                                                                                                                                                                                                        |            |                 |                 |                 |       |       |                 |      |       |  |                 |                 |                                                                                                                                                                                                                                                                                                                        |            |                 |                 |                 |       |       |                 |      |       |  |                 |                 |
| Less vulnerable         | 29275                                                                                                                                                                                                                                                                                                                  | 17449           |                 |                 |                 |       |       |                 |      |       |  |                 |                 |                                                                                                                                                                                                                                                                                                                        |            |                 |                 |                 |       |       |                 |      |       |  |                 |                 |                                                                                                                                                                                                                                                                                                                        |            |                 |                 |                 |       |       |                 |      |       |  |                 |                 |
| More vulnerable         | 6321                                                                                                                                                                                                                                                                                                                   | 40072           |                 |                 |                 |       |       |                 |      |       |  |                 |                 |                                                                                                                                                                                                                                                                                                                        |            |                 |                 |                 |       |       |                 |      |       |  |                 |                 |                                                                                                                                                                                                                                                                                                                        |            |                 |                 |                 |       |       |                 |      |       |  |                 |                 |
|                         | Less vulnerable                                                                                                                                                                                                                                                                                                        | More vulnerable |                 |                 |                 |       |       |                 |      |       |  |                 |                 |                                                                                                                                                                                                                                                                                                                        |            |                 |                 |                 |       |       |                 |      |       |  |                 |                 |                                                                                                                                                                                                                                                                                                                        |            |                 |                 |                 |       |       |                 |      |       |  |                 |                 |
| True label              | Less vulnerable                                                                                                                                                                                                                                                                                                        | More vulnerable |                 |                 |                 |       |       |                 |      |       |  |                 |                 |                                                                                                                                                                                                                                                                                                                        |            |                 |                 |                 |       |       |                 |      |       |  |                 |                 |                                                                                                                                                                                                                                                                                                                        |            |                 |                 |                 |       |       |                 |      |       |  |                 |                 |
| Less vulnerable         | 30306                                                                                                                                                                                                                                                                                                                  | 16418           |                 |                 |                 |       |       |                 |      |       |  |                 |                 |                                                                                                                                                                                                                                                                                                                        |            |                 |                 |                 |       |       |                 |      |       |  |                 |                 |                                                                                                                                                                                                                                                                                                                        |            |                 |                 |                 |       |       |                 |      |       |  |                 |                 |
| More vulnerable         | 9098                                                                                                                                                                                                                                                                                                                   | 37295           |                 |                 |                 |       |       |                 |      |       |  |                 |                 |                                                                                                                                                                                                                                                                                                                        |            |                 |                 |                 |       |       |                 |      |       |  |                 |                 |                                                                                                                                                                                                                                                                                                                        |            |                 |                 |                 |       |       |                 |      |       |  |                 |                 |
|                         | Less vulnerable                                                                                                                                                                                                                                                                                                        | More vulnerable |                 |                 |                 |       |       |                 |      |       |  |                 |                 |                                                                                                                                                                                                                                                                                                                        |            |                 |                 |                 |       |       |                 |      |       |  |                 |                 |                                                                                                                                                                                                                                                                                                                        |            |                 |                 |                 |       |       |                 |      |       |  |                 |                 |
| True label              | Less vulnerable                                                                                                                                                                                                                                                                                                        | More vulnerable |                 |                 |                 |       |       |                 |      |       |  |                 |                 |                                                                                                                                                                                                                                                                                                                        |            |                 |                 |                 |       |       |                 |      |       |  |                 |                 |                                                                                                                                                                                                                                                                                                                        |            |                 |                 |                 |       |       |                 |      |       |  |                 |                 |
| Less vulnerable         | 30016                                                                                                                                                                                                                                                                                                                  | 16708           |                 |                 |                 |       |       |                 |      |       |  |                 |                 |                                                                                                                                                                                                                                                                                                                        |            |                 |                 |                 |       |       |                 |      |       |  |                 |                 |                                                                                                                                                                                                                                                                                                                        |            |                 |                 |                 |       |       |                 |      |       |  |                 |                 |
| More vulnerable         | 9470                                                                                                                                                                                                                                                                                                                   | 36923           |                 |                 |                 |       |       |                 |      |       |  |                 |                 |                                                                                                                                                                                                                                                                                                                        |            |                 |                 |                 |       |       |                 |      |       |  |                 |                 |                                                                                                                                                                                                                                                                                                                        |            |                 |                 |                 |       |       |                 |      |       |  |                 |                 |
|                         | Less vulnerable                                                                                                                                                                                                                                                                                                        | More vulnerable |                 |                 |                 |       |       |                 |      |       |  |                 |                 |                                                                                                                                                                                                                                                                                                                        |            |                 |                 |                 |       |       |                 |      |       |  |                 |                 |                                                                                                                                                                                                                                                                                                                        |            |                 |                 |                 |       |       |                 |      |       |  |                 |                 |

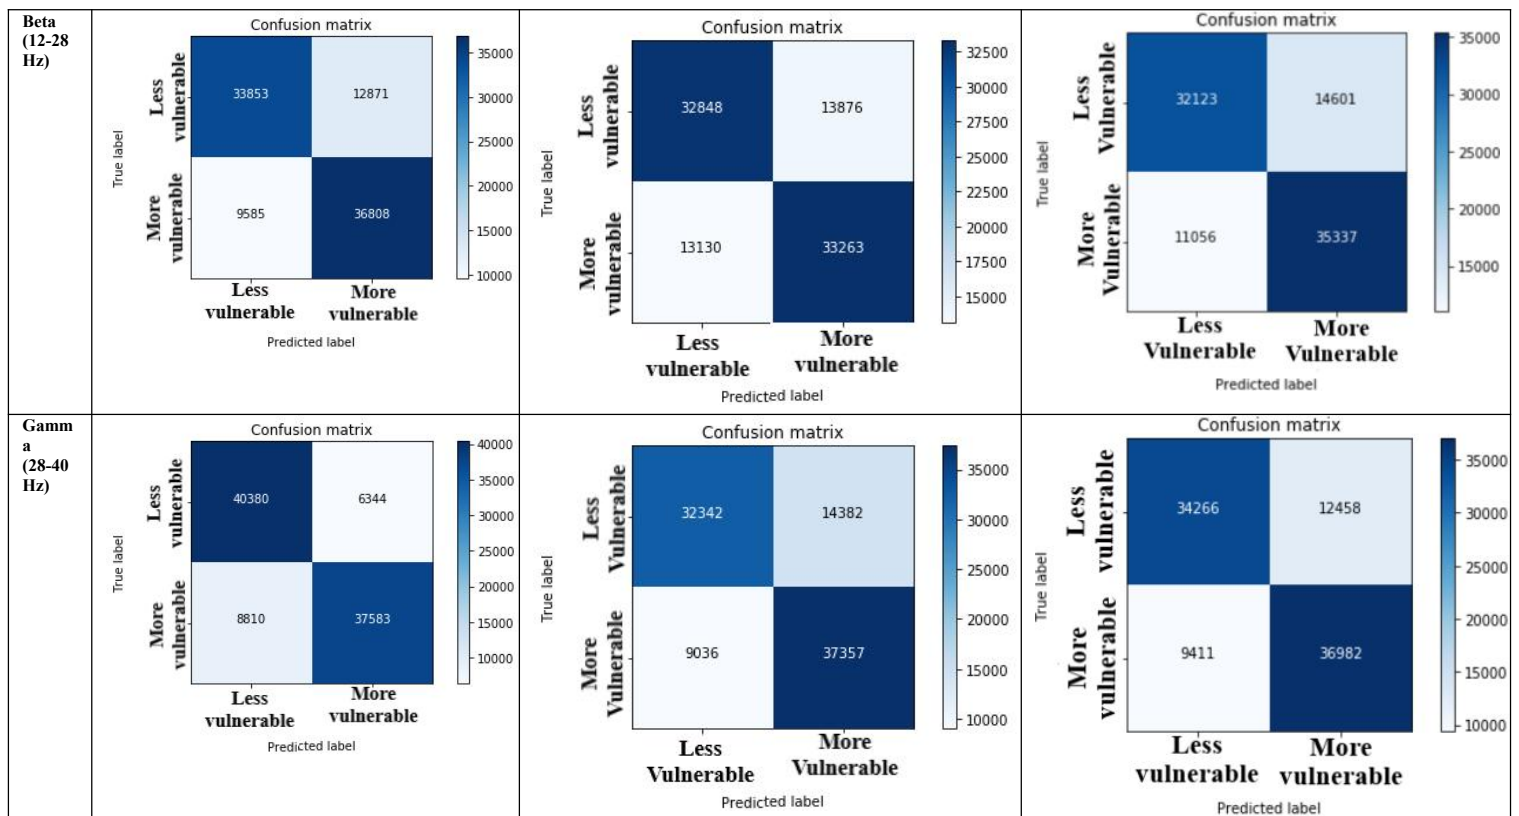

**Supplement Table VII.** The confusion matrices for classification results of task-based EEG data using 1D-CNN, LSTM and BLSTM

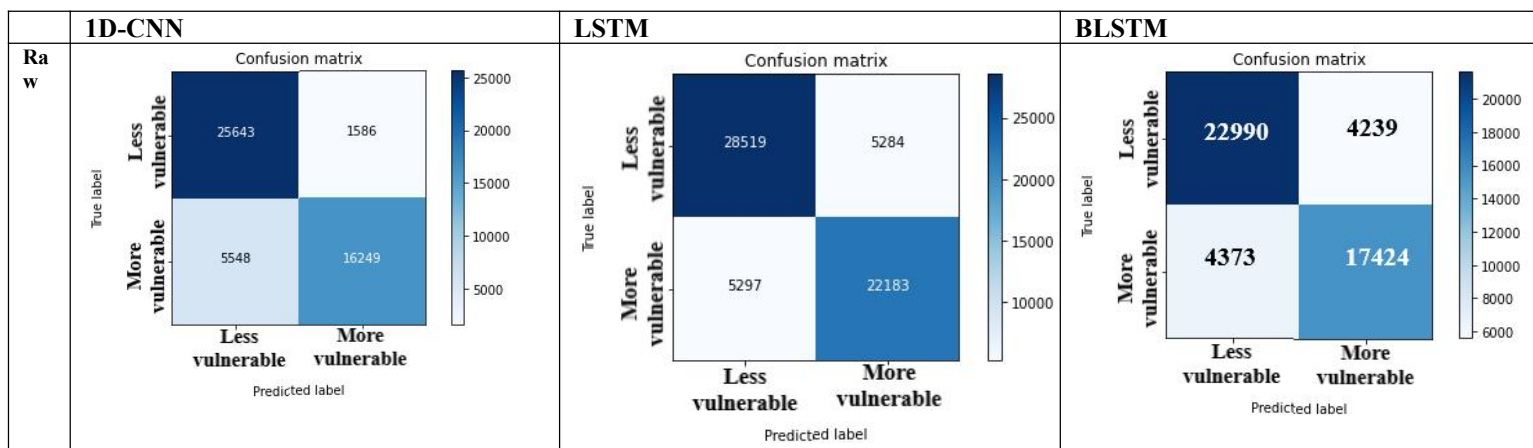

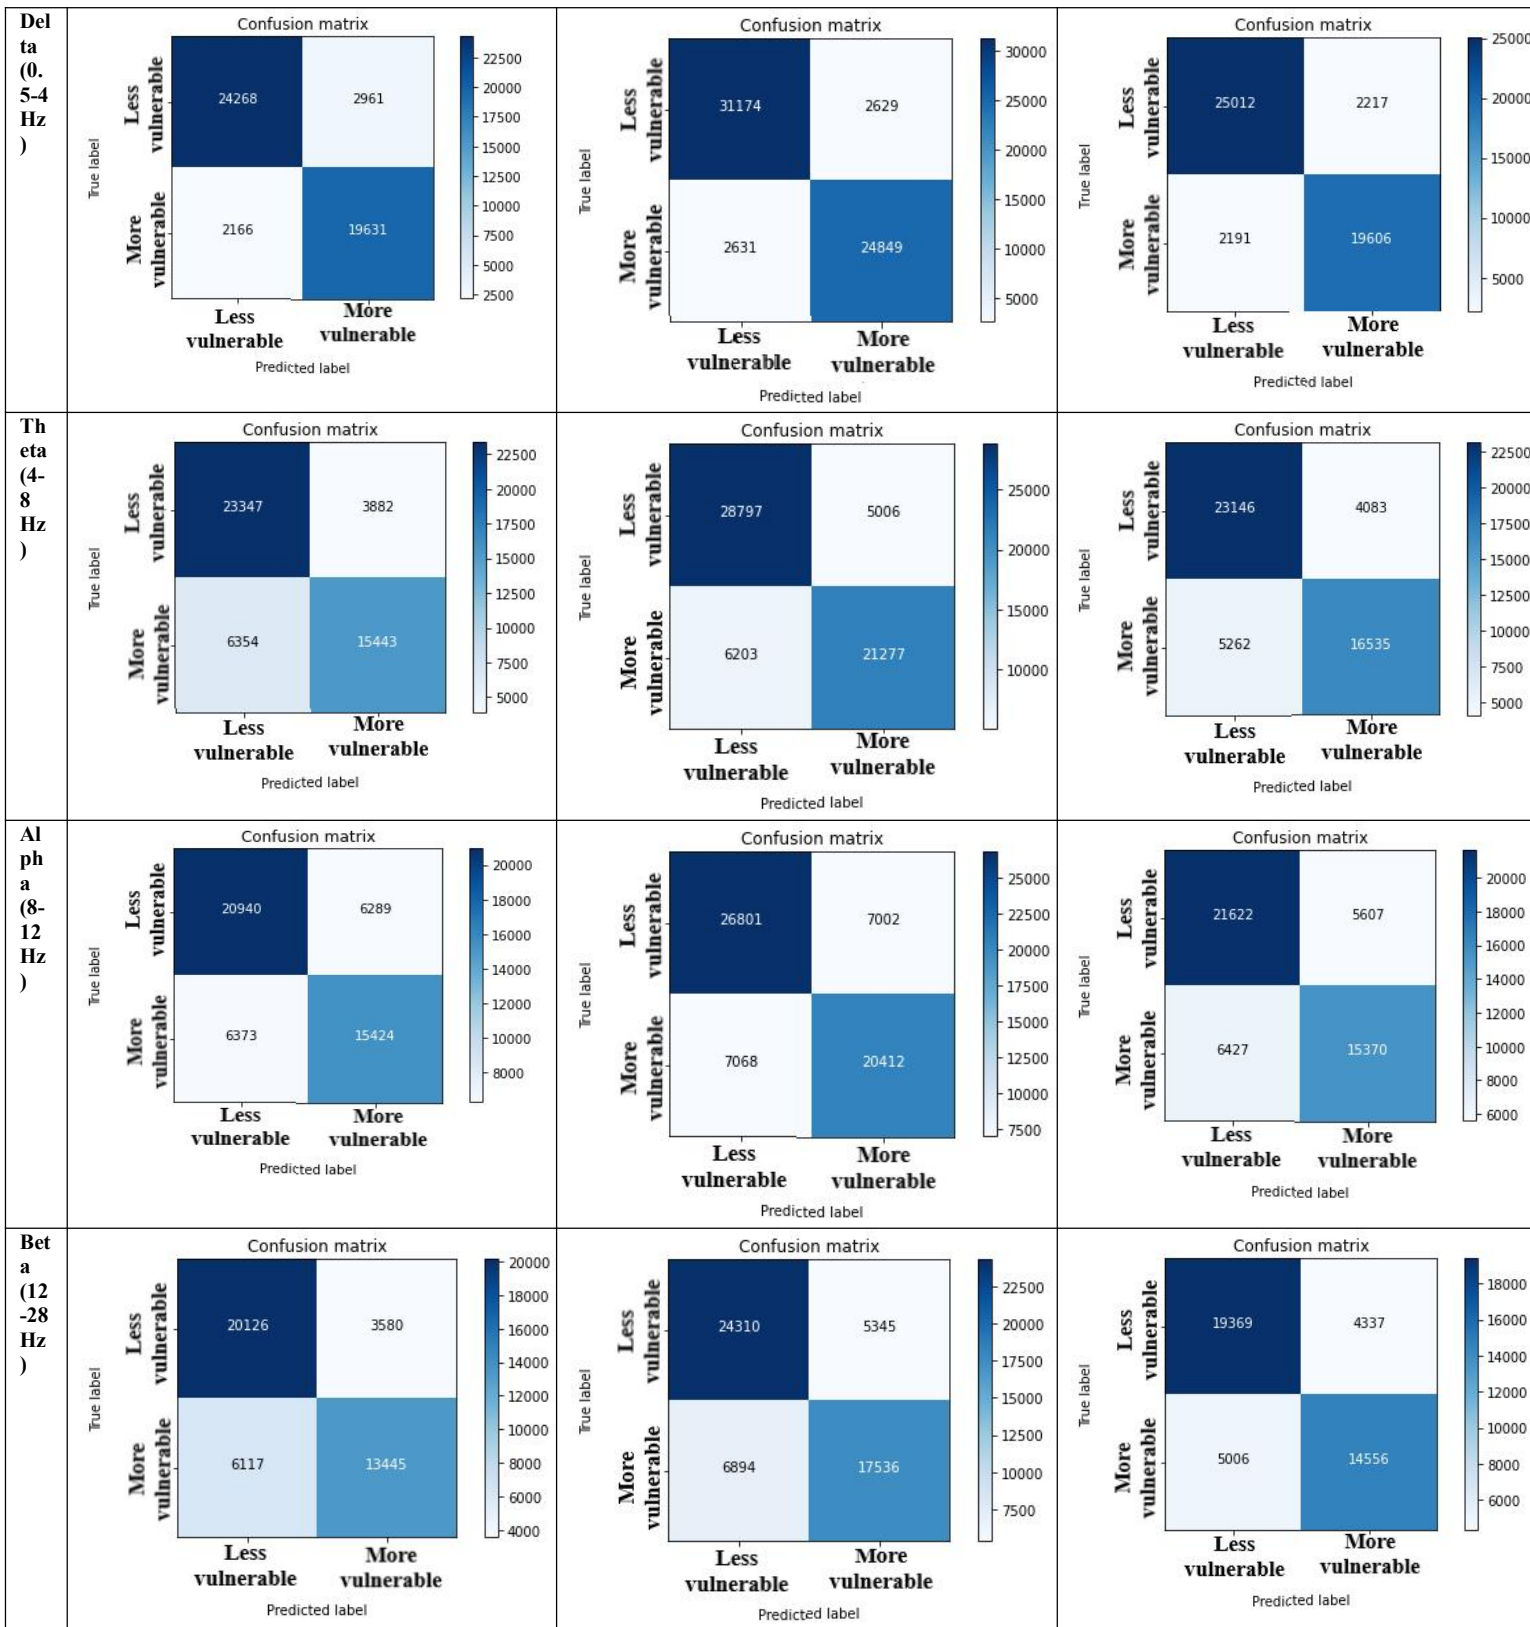

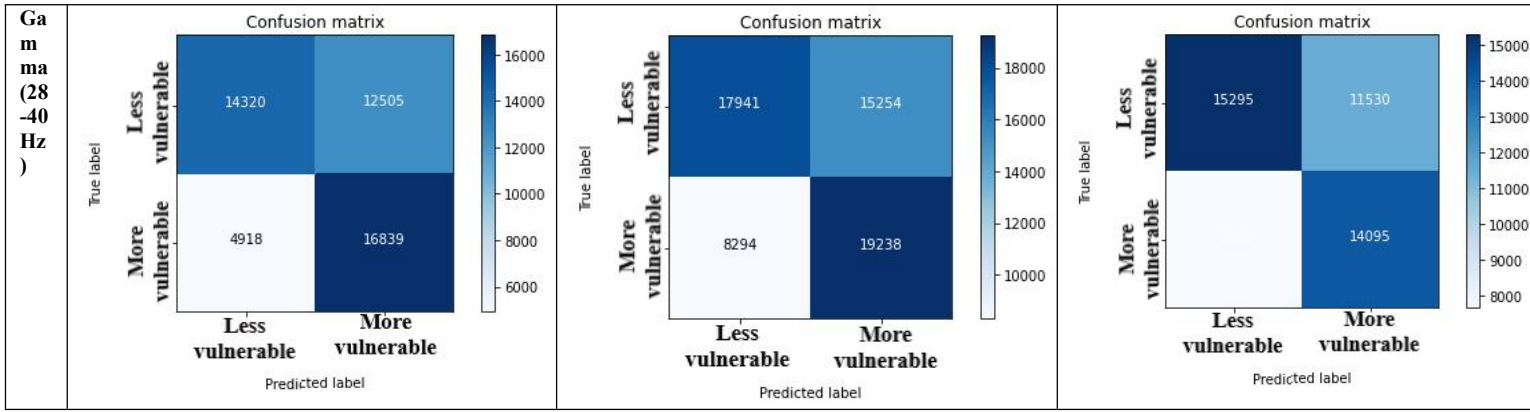

**Supplement Table VIII.** The confusion matrices for classification results of task-based EEG data using MultiLayer Perceptron (MLP) and Decision Tree (DT).

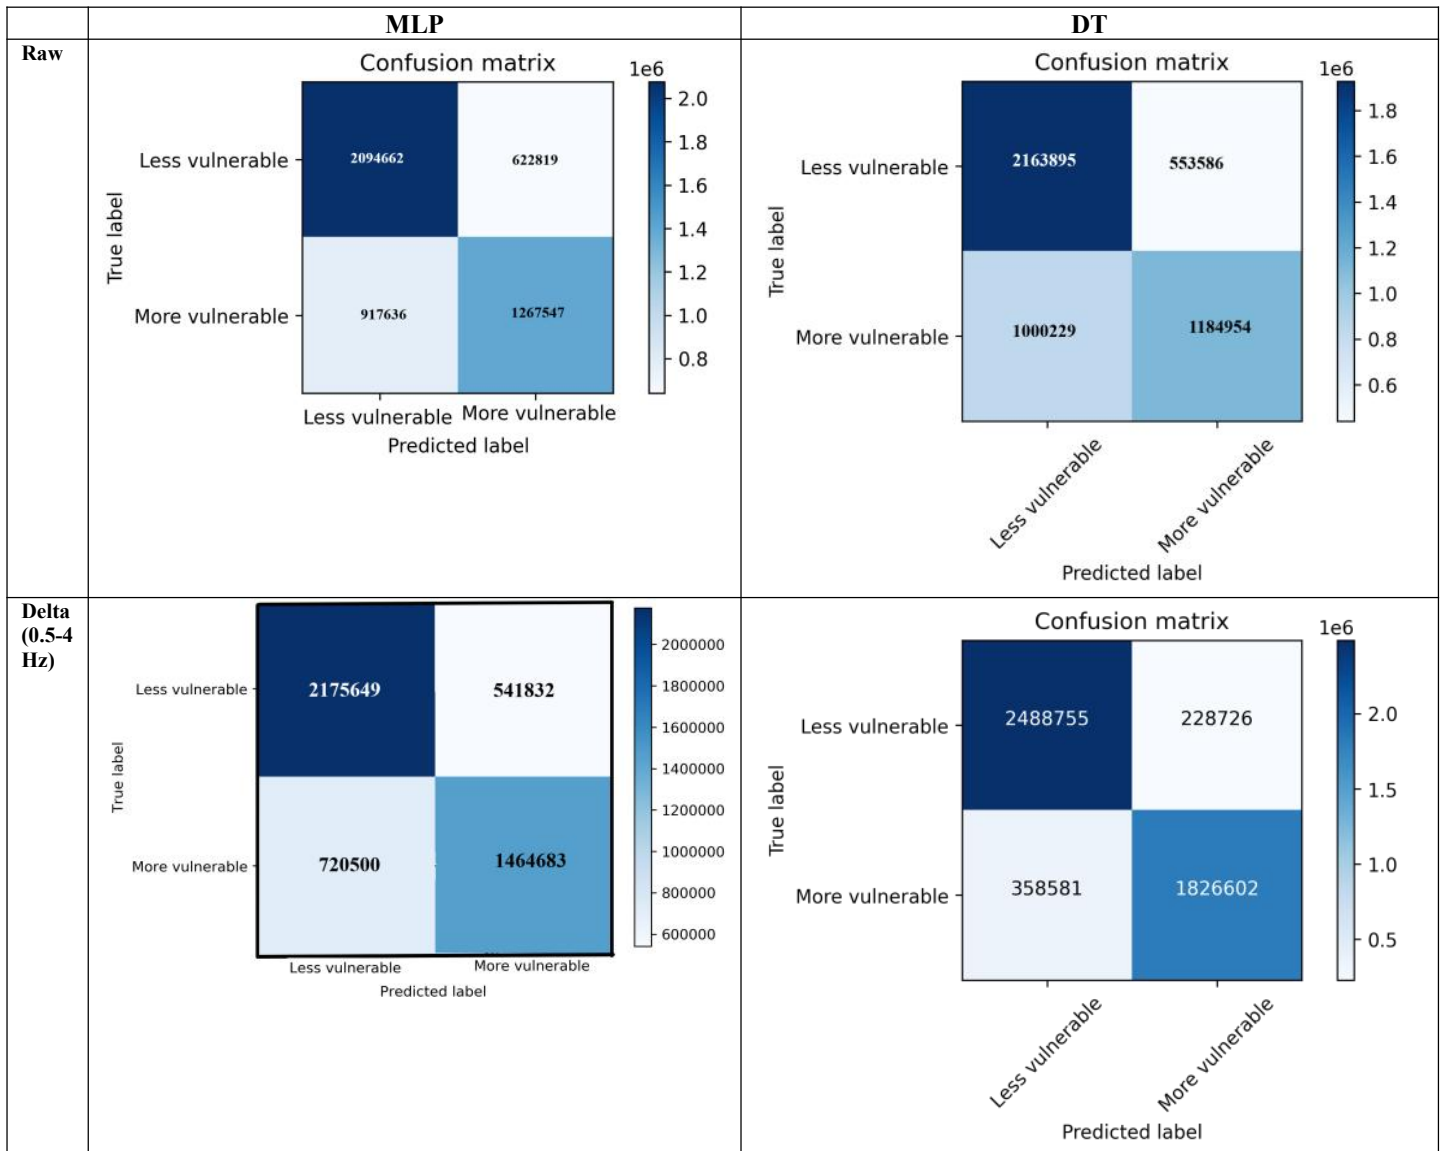



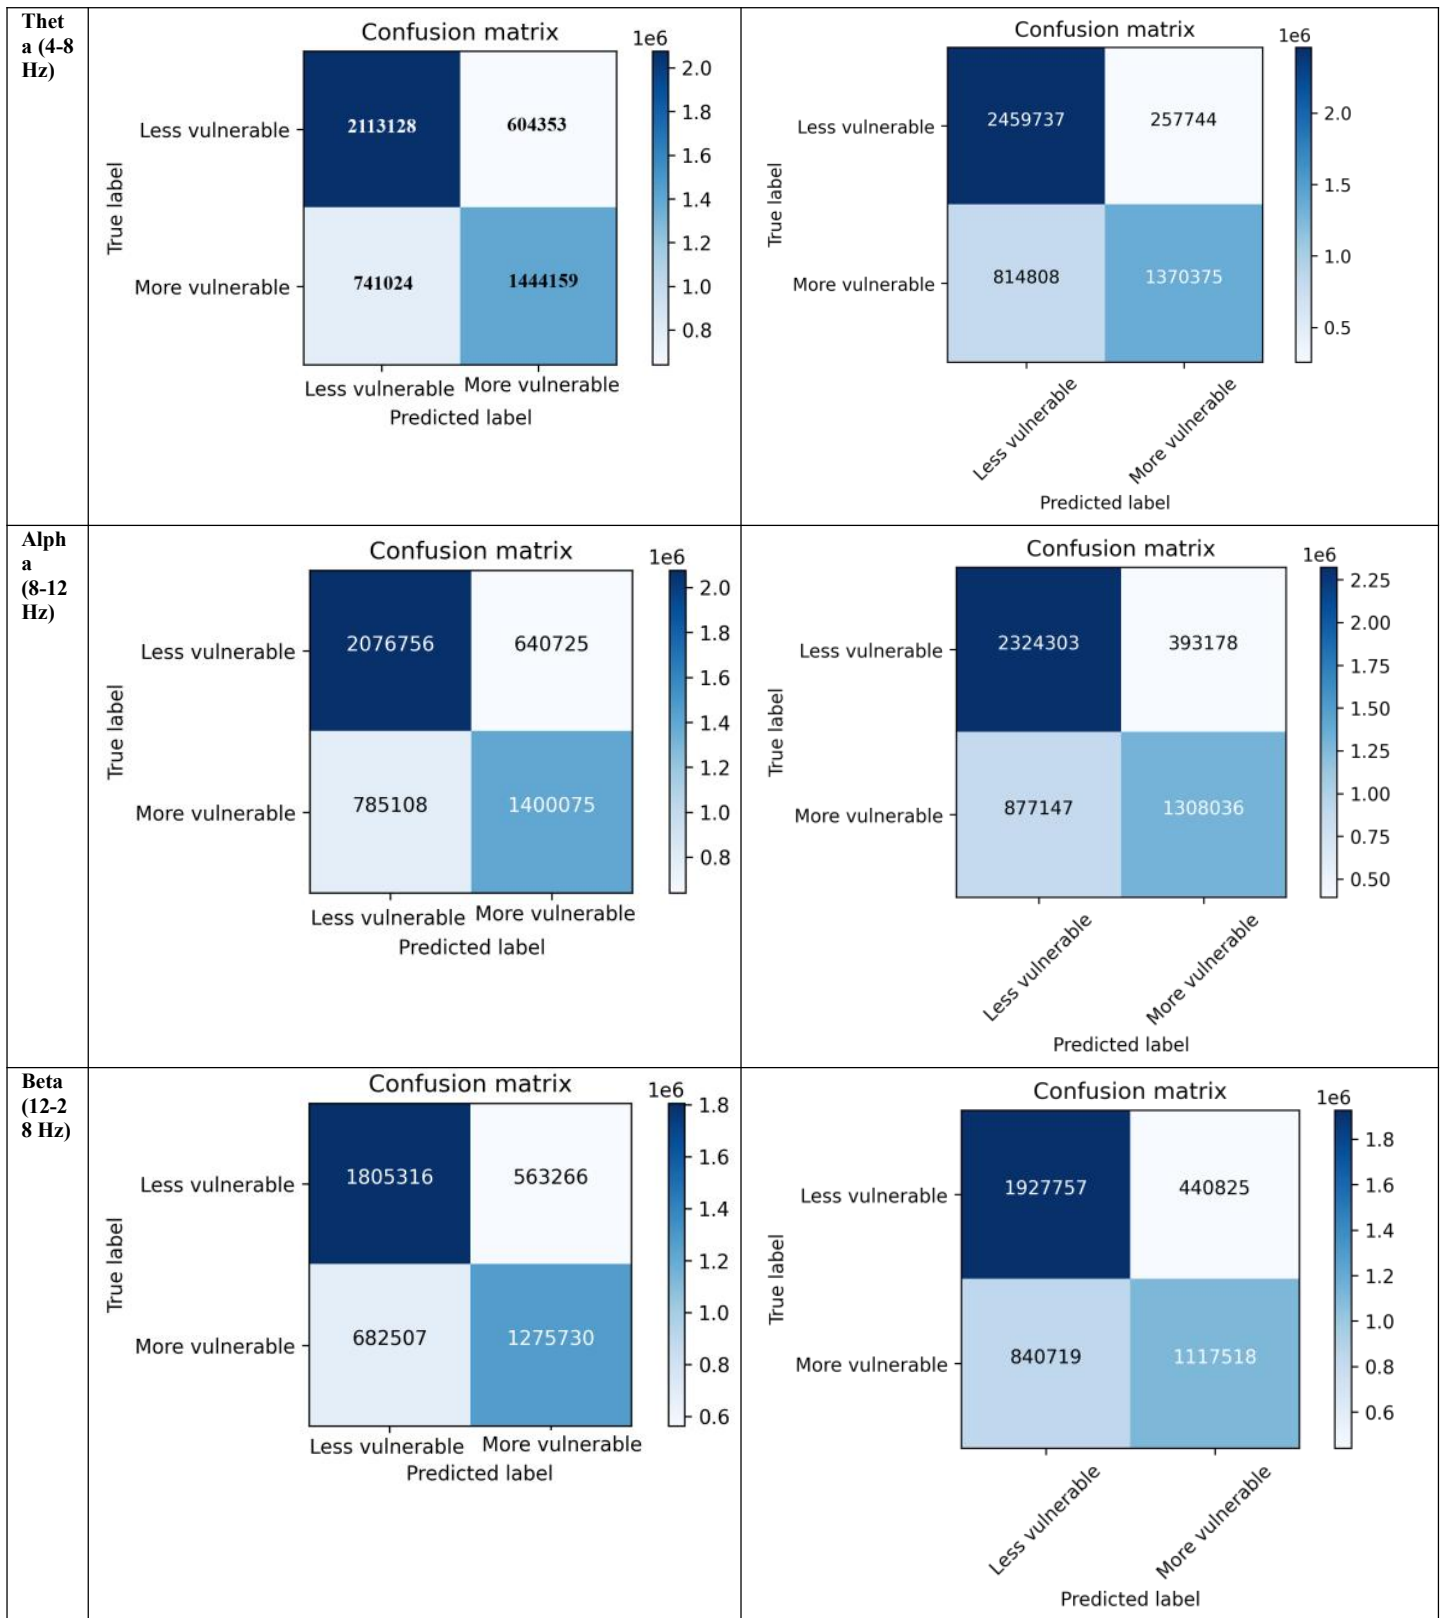

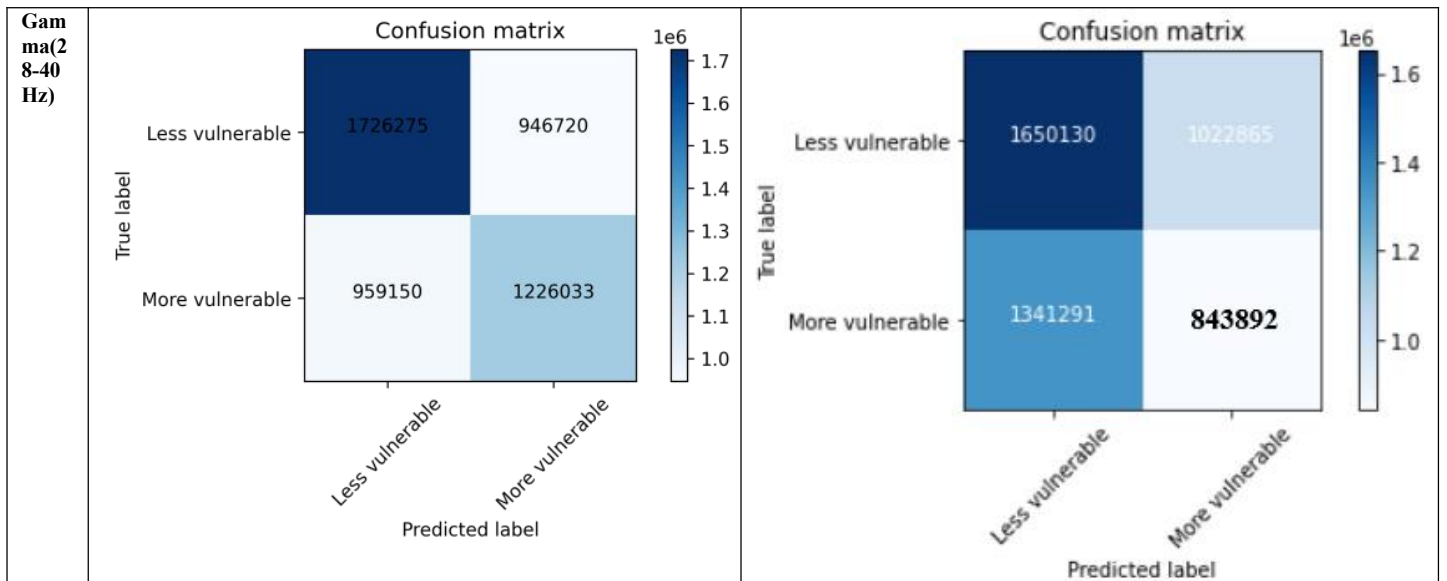

**Supplement Table IX.** The confusion matrices for classification results of **rs-EEG** using MultiLayer Perceptron (MLP) and Decision Tree (DT).

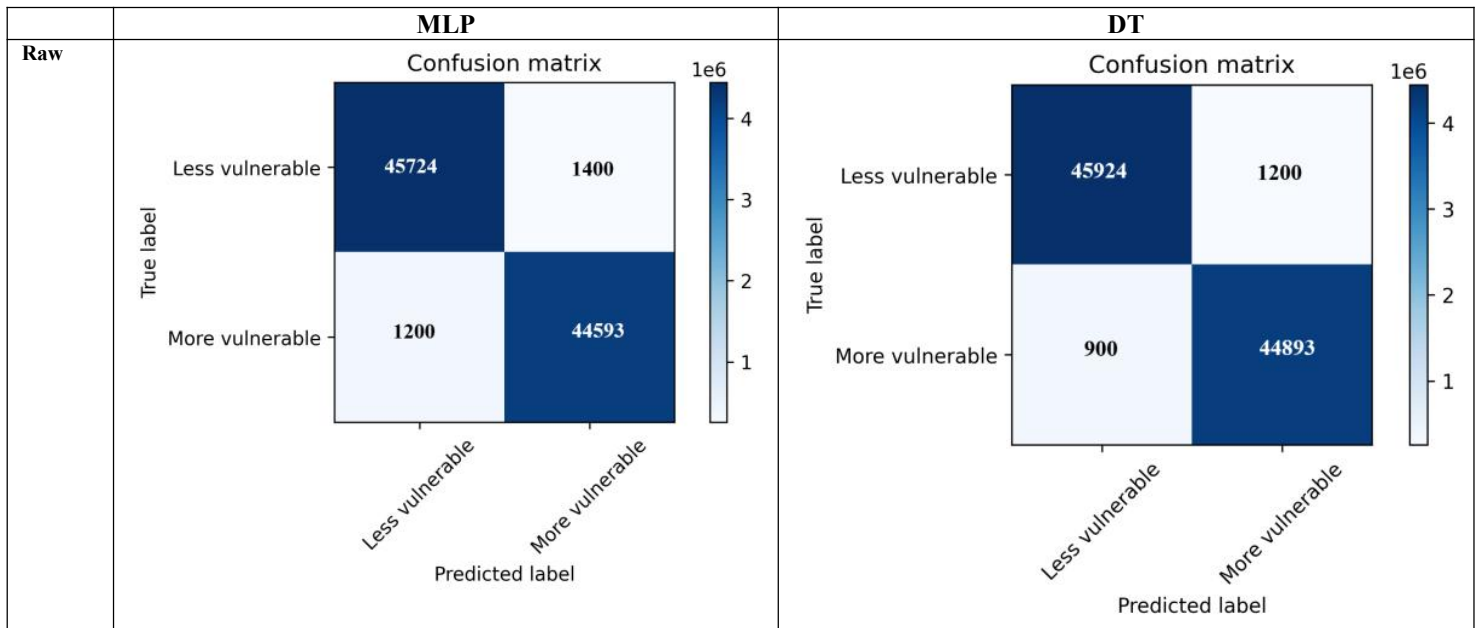

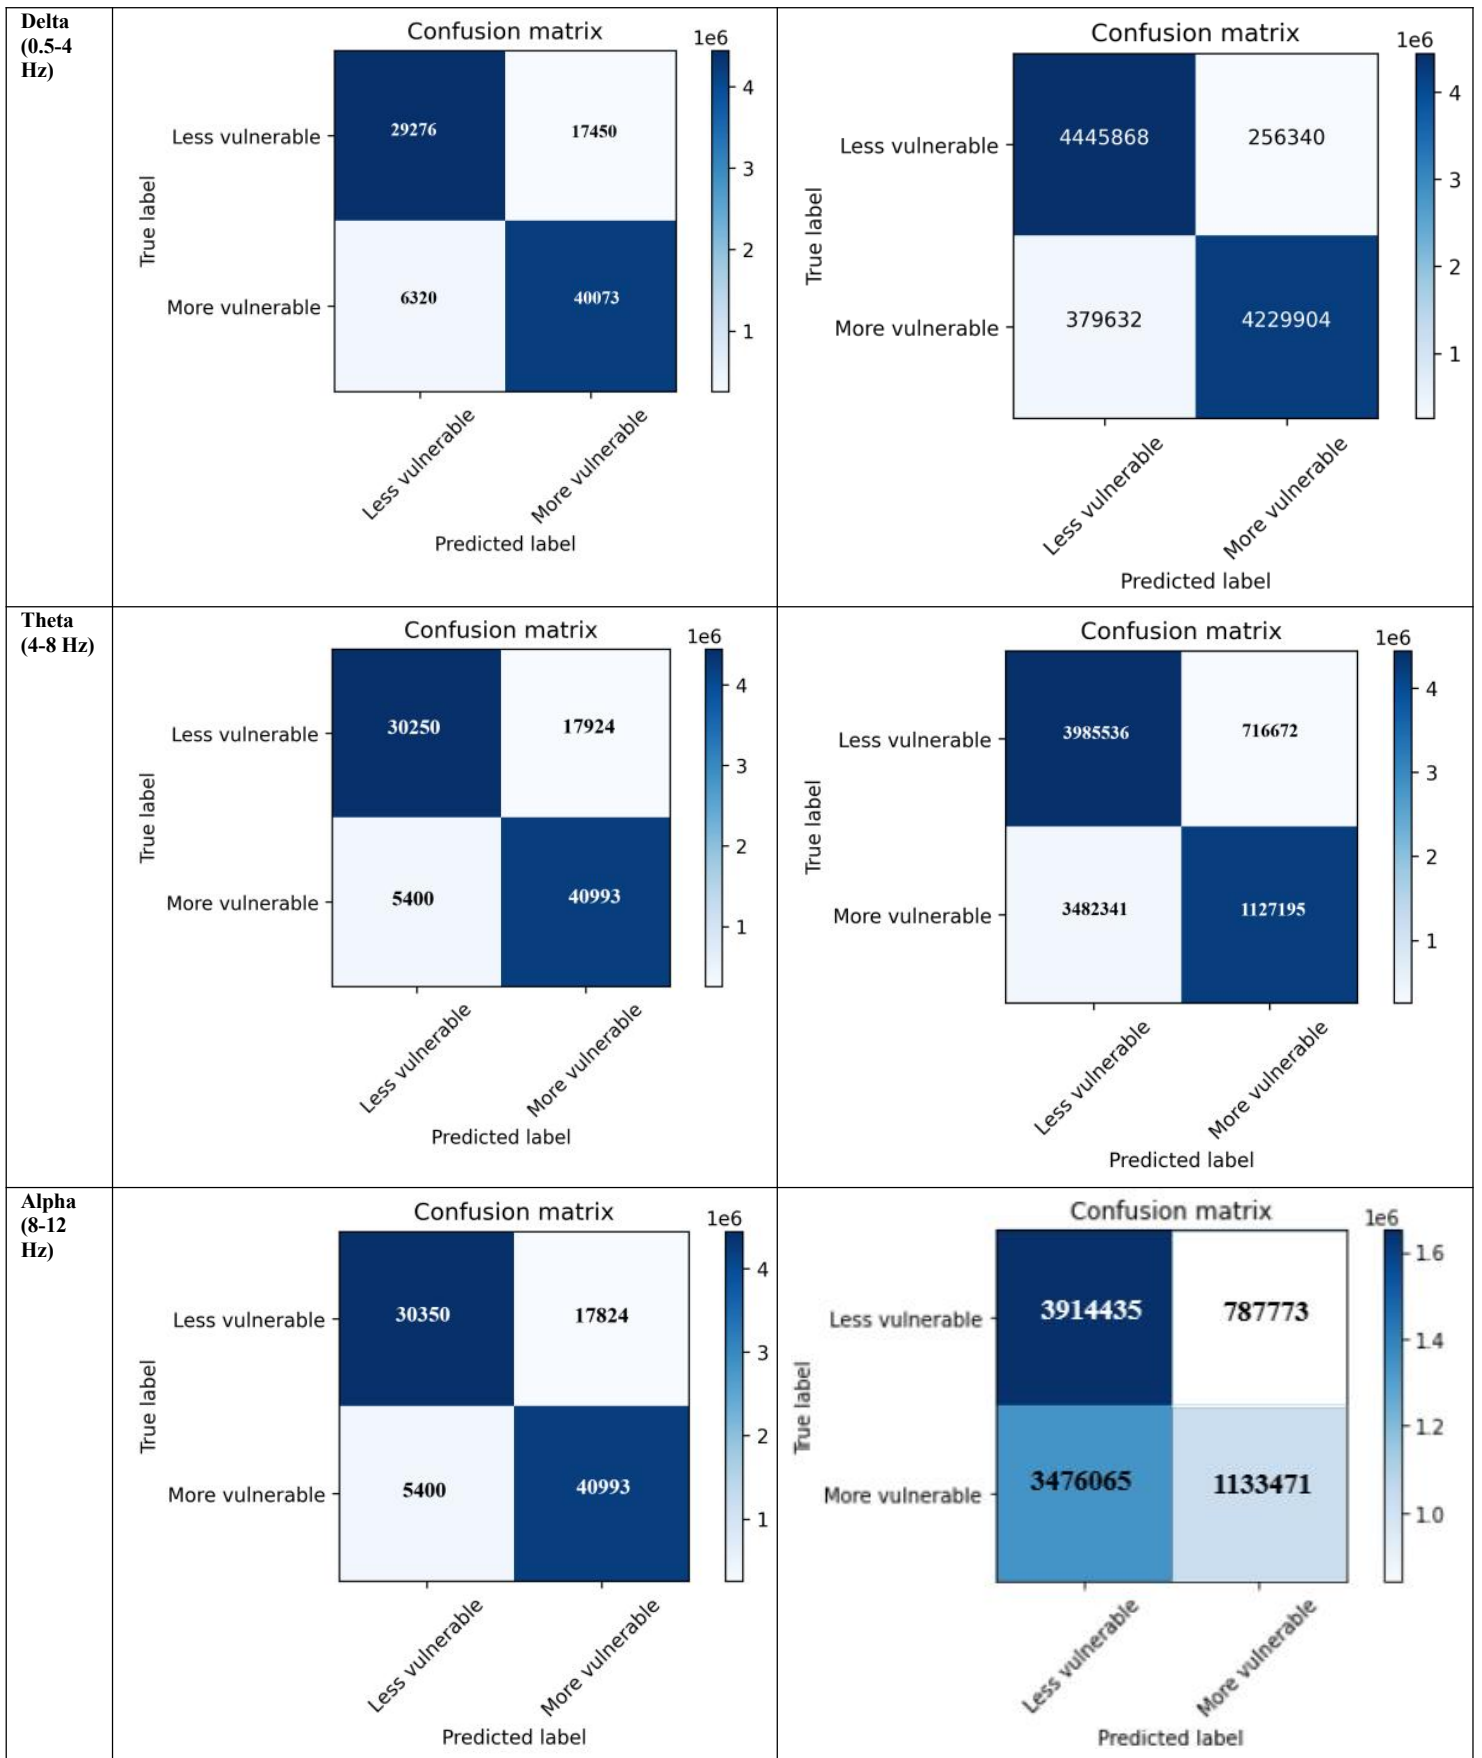



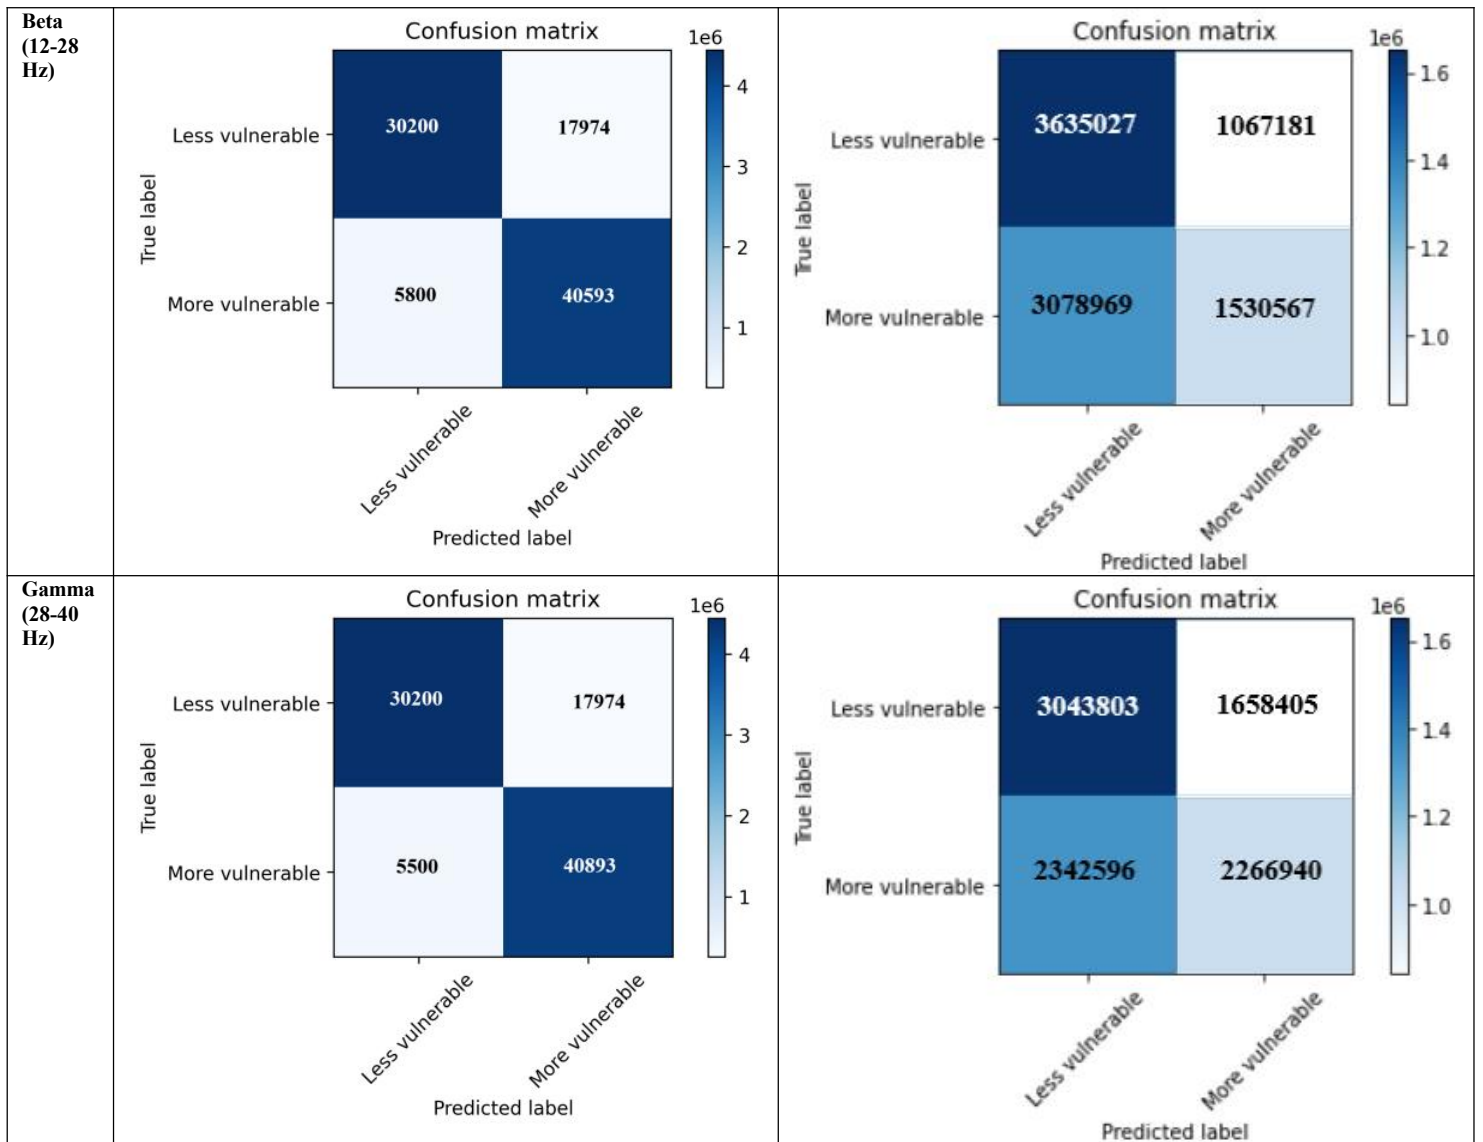

**References**

- [1] Rumelhart, D. E., Hinton, G. E. & Williams, R. J. Learning representations by back-propagating errors. *nature* 323, 533–536 (1986).
- [2] Zhao, X. et al. Classification of sleep apnea based on EEG sub-band signal characteristics. *Sci. Reports* 11, 1–11 (2021).
- [3] Emary, E., Zawbaa, H. M., & Hassanien, A. E. Binary grey wolf optimization approaches for feature selection. *Neurocomputing*, 172, 371-381 (2016).
